# Supplementary material for: Lessons learned from rapid exome sequencing for 575 critically ill patients across the broad spectrum of rare disease
Source: Front Genet. 2024 Jan 8;14:1304520. doi: 10.3389/fgene.2023.1304520 (PMC10800954; doi:10.3389/fgene.2023.1304520)
Supplement: Supplementary file 1 [file Table2.XLSX]

## Sheet: Supplementary Table 2_SNVIndels
Patient	Type of mutation	Gene	Mode of inheritance	Genomic (GRCh37)	cDNA	Protein effect	Zygosity
1	SNV/Indel	FLNB	AD	Chr3(GRCh37):g.58062938T>A	NM_001457.3:c.458T>A	p.(Ile153Asn)	heterozygous, de novo
4	SNV/Indel	DYNC2H1	AR	Chr11(GRCh37):g.103091449A>G Chr11(GRCh37):g.103025474T>G	NM_001080463.1:c.9044A>G NM_001080463.1:c.3509T>G	p.(Asp3015Gly) p.(Leu1170*)	heterozygous, maternal heterozygous, paternal
10	SNV/Indel	TUBB2A	AD	Chr6(GRCh37):g.3154617A>C	NM_001069.2:c.818T>G	p.(Leu273Arg)	heterozygous, de novo
11	SNV/Indel	ANKRD11	AD	Chr16(GRCh37):g.89346446del	NM_001256182.1:c.6504del	p.(Ala2170fs)	heterozygous, de novo
17	SNV/Indel	WNT5A	AD	Chr3(GRCh37):g.55504170C>T	NM_003392.4:c.1093G>A	p.(Val365Ile)	heterozygous, de novo
20	SNV/Indel	NF1	AD	Chr17(GRCh37):g.29562746C>T	NM_001042492.2:c.3826C>T	p.(Arg1276*)	heterozygous, de novo
25#	SNV/Indel	DHFR	AR	Chr5(GRCh37):g.79950248C>T	NM_000791.3:c.61G>A	p.(Gly21Arg)	homozygous
26	SNV/Indel	DHFR	AR	Chr5(GRCh37):g.79950248C>T	NM_000791.3:c.61G>A	p.(Gly21Arg)	homozygous
33	SNV/Indel	KCNT1	AD	Chr9(GRCh37):g.138657477A>G	NM_020822.2:c.1208A>G	p.(Tyr403Cys)	heterozygous, de novo
35	SNV/Indel	STXBP1	AD	Chr9(GRCh37):g.130438082G>A	NM_003165.3:c.1111-1G>A	p.(r.spl?)	heterozygous, de novo
55	SNV/Indel	ERCC5	AR	Chr13(GRCh37):g.103514595C>T	NM_000123.3:c.1096C>T	p.(Arg366*)	homozygous
61	SNV/Indel	ZEB2	AD	Chr2(GRCh37):g.145147448T>C	NM_014795.3:c.3215A>G	p.(Gln1072Arg)	heterozygous, de novo
198	SNV/Indel	MTM1	XL	ChrX(GRCh37):g.149764983C>T	NM_000252.2:c.85C>T	p.(Arg29*)	hemizygous
70	SNV/Indel	GNAO1	AD	Chr16(GRCh37):g.56226265G>C	NM_020988.2:c.118G>C	p.(Gly40Arg)	heterozygous, mosaic in child
73	SNV/Indel	MYH7	AD	Chr14(GRCh37):g.23889151A>G	NM_000257.3:c.3629T>C	p.(Leu1210Pro)	heterozygous, de novo
74	SNV/Indel	FGFR3	AD	Chr4(GRCh37):g.1803564C>T	NM_000142.4:c.742C>T	p.(Arg248Cys)	heterozygous, de novo
77	SNV/Indel	WDR35	AR	Chr2(GRCh37):g.20133230C>T Chr2(GRCh37):g.20189045T>C	NM_001006657.1:c.2623G>A NM_001006657.1:c.25-2A>G	p.(Ala875Thr) r.spl?	heterozygous, maternal heterozygous, paternal
80	SNV/Indel	SYNJ1	AR	Chr21(GRCh37):g.34099160dup	NM_003895.3:c.164dup	p.(Pro56fs)	homozygous
81	SNV/Indel	AMT	AR	Chr3(GRCh37):g.49459866_49459869del	NM_000481.3:c.15_18del	p.(Ser6fs)	homozygous
82	SNV/Indel	SHOC2	AD	Chr10(GRCh37):g.112724120A>G	NM_007373.3:c.4A>G	p.(Ser2Gly)	heterozygous, de novo
83	SNV/Indel	TCF4	AD	Chr18(GRCh37):g.53017619G>A	NM_001083962.1:c.520C>T	p.(Arg174*)	heterozygous (transmission from mosaic mother)
88	SNV/Indel	TSC2	AD	Chr16(GRCh37):g.2138295G>C	NM_000548.4:c.5228G>C	p.(Arg1743Pro)	heterozygous, de novo
90	SNV/Indel	COL1A2	AD	Chr7(GRCh37):g.94039107G>A	NM_000089.3:c.1009G>A	p.(Gly337Ser)	heterozygous (transmitted through unaffected mater)
91	SNV/Indel	HRAS	AD	Chr11(GRCh37):g.534288C>G	NM_005343.2:c.35G>C	p.(Gly12Ala)	heterozygous, de novo
444	SNV/Indel	AR	XL	ChrX(GRCh37):g.66905905C>T	NM_000044.4:c.1822C>T	p.(Arg608*)	hemizygous
99	SNV/Indel	SLC26A2	AR	Chr5(GRCh37):g.149357747C>T Chr5(GRCh37):g.149359991C>T	NM_000112.3:c.532C>T NM_000112.3:c.835C>T	p.(Arg178*) p.(Arg279Trp)	heterozygous, paternal heterozygous, maternal
100	SNV/Indel	PKHD1	AR	Chr6(GRCh37):g.51695771del Chr6(GRCh37):g.51924725C>T	NM_138694.3:c.8190del NM_138694.3:c.1233+1G>A	p.(Glu2731fs) (r.spl?)	heterozygous, maternal heterozygous, paternal
101	SNV/Indel	PRRT2	AD	Chr16(GRCh37):g.29825024dup	NM_145239.2:c.649dup	p.(Arg217fs)	heterozygous, paternal
104	SNV/Indel	PTPN11	AD	Chr12(GRCh37):g.112888170_112888172del	NM_001330437.1:c.186_188del	p.(Tyr63del)	heterozygous, de novo
105	SNV/Indel	FGFR2	AD	Chr10(GRCh37):g.123276865G>C	NM_000141.4:c.1052C>G	p.(Ser351Cys)	heterozygous, de novo
107	SNV/Indel	COL2A1	AD	Chr12(GRCh37):g.48378337C>G	NM_001844.4:c.1879G>C	(p.(Gly627Arg)	heterozygous, de novo
108	SNV/Indel	ACTA1	AD	Chr1(GRCh37):g.229567834C>T	NM_001100.3:c.715G>A	p.(Glu239Lys)	heterozygous, de novo
112	SNV/Indel	TSEN54	AR	Chr17(GRCh37):g.73518081G>T	NM_207346.2:c.919G>T	p.(Ala307Ser)	homozygous
113	SNV/Indel	NAXE	AR	Chr1(GRCh37):g.156562230_156562232del	NM_144772.2:c.365_367del	p.(Gly122del)	homozygous
118	SNV/Indel	NEK9	AR	Chr14(GRCh37):g.75567826T>C Chr14(GRCh37):g.75590815_75590817del	NM_033116.5:c.1871A>G NM_033116.5:c.329_331del	p.(Asn624Ser) p.(Asn110del)	heterozygous, maternal heterozygous, paternal
123	SNV/Indel	PROC	AR	Chr2(GRCh37):g.128183783C>T;	NM_000312.3:c.658C>T	p.(Arg220Trp)	homozygous
125	SNV/Indel	PLA2G6	AR	Chr22(GRCh37):g.38508218_38508219del	NM_003560.3:c.2370_2371del	p.(Tyr790*)	homozygous
126	SNV/Indel	COL2A1	AD	Chr12(GRCh37):g.48387611G>A;	NM_001844.4:c.905C>T	p.(Ala302Val)	heterozygous, de novo
132	SNV/Indel	SF3B4	AD	Chr1(GRCh37):g.149895907C>G;	NM_005850.4:c.914-1G>C	(r.spl.?)	heterozygous, de novo
140	SNV/Indel	IGHMBP2	AR	Chr11(GRCh37):g.68678947A>G Chr11(GRCh37):g.68700859G>A	NM_002180.2:c.587A>G NM_002180.2:c.1328G>A	p.(Gln196Arg) p.(Arg443His)	heterozygous, maternal heterozygous, paternal
146	SNV/Indel	STIM1	AR	Chr11(GRCh37):g.4091329del	NM_003156.3:c.687del	p.(Phe229fs)	homozygous
148	CNV + SNV/Indel	DYM	AR	Chr18(GRCh37):g.46906114G>A; Seq[GRCh37] del(18)(q21.1q21.1); Chr18:g.(46808542_46812769)_(46812938_46858186)del	NM_017653.4;c.208C>T gene deletion	p.(Arg70*) gene deletion	heterozygous, paternal heterozygous, maternal
156	SNV/Indel	RAF1 CREBBP	AR	Chr3(GRCh37):g.12641216C>G Chr16(GRCh37):g.3823889T>C	NM_002880.3:c.1082G>C (p.(Gly361Ala) NM_004380.2:c.2326A>G (p.(Met776Val) / r.(spl?))	p.(Gly361Ala) p.(Met776Val) / r.(spl?))	heterozygous heterozygous
159	SNV/Indel	COL2A1	AD	Chr12(GRCh37):g.48369745C>G	NM_001844.4:c.3597+1G>C	r.spl.?	heterozygous, maternal
161	SNV/Indel	AGTR1	AR	Chr3(GRCh37):g.148459198C>T	NM_031850.3:c.481C>T	p.(Arg161*)	homozygous
163	SNV/Indel	PSMD12	AD	Chr17(GRCh37):g.65344730A>T	NM_002816.3:c.446T>A	p.(Leu149*)	heterozygous, de novo
164	SNV/Indel	TUBA1A	AD	Chr12(GRCh37):g.49578944C>T	NM_001270399.1:c.1205G>A	p.(Arg402His)	heterozygous, de novo
168	SNV/Indel	RUNX2	AD	Chr6(GRCh37):g.45405728C>T	NM_001024630.3:c.625C>T	p.(Gln209*)	heterozygous, de novo
170	SNV/Indel	SCN2A	AD	Chr2(GRCh37):g.166164386A>G	NM_021007.2:c.415A>G	p.(Ile139Val)	heterozygous, mosaic in child
172	SNV/Indel	NPRL3	AD	Chr16(GRCh37):g.138784del	NM_001077350.2:c.1456del	p.(Leu486fs)	heterozygous, maternal
173	SNV/Indel	COL2A1	AD	Chr12(GRCh37):g.48380940C>T	NM_001844.4:c.1286G>A	p.(Gly429Asp)	heterozygous, de novo
178	SNV/Indel	SLC37A4	AR	Chr11(GRCh37):g.118895981_118895982delAG	NM_001164278:c.1108_1109delCT	p.(Leu370Valfs*53)	homozygous
180	SNV/Indel	DYNC2H1	AR	Chr11(GRCh37):g.102991434C>T Chr11(GRCh37):g.103178534_103178535del	NM_001080463.1:c.1151C>T NM_001080463.1:c11488_11489del	p.(Ala384Val) p.(Gln3830fs)	heterozygous, paternal heterozygous, maternal
181	SNV/Indel	KCNT1	AD	Chr9(GRCh37):g.138651532G>A	NM_020822.2:c.862G>A	p.(Gly288Ser)	heterozygous, de novo
189	SNV/Indel	ALG6	AR	Chr1(GRCh37):g.63836701G>A Chr1(GRCh37):g.63894406C>T	NM_013339.3:c.53G>A NM_013339.3.c.1061C>T	p.(Arg18Gln) p.(Pro354Leu)	heterozygous heterozygous
197	SNV/Indel	TMEM218	AR	Chr11(GRCh37):g.124971135G>A	NM_001258243.1:c.280C>T	p.(Arg94*)	homozygous
479	SNV/Indel	ZC4H2	XL	ChrX(GRCh37):g.64137746G>A	NM_018684.3:c.592C>T	p.(Arg198Trp)	hemizygous
200	SNV/Indel	TUBA1A	AD	Chr12(GRCh37):g.49578864C>T	NM_001270399.1:c.1285G>A	p.(Glu429Lys)	heterozygous, de novo
203	SNV/Indel	STXBP2	AR	Chr19(GRCh37):g.7710082G>C Chr19(GRCh37):g.7712322G>A	NM_006949.3:c.1247-1G>C NM_006949.3:c.1621G>A	r.(spl?) p.(Gly541Ser)	heterozygous, paternal heterozygous, maternal
207	SNV/Indel	KCNQ2	AD	Chr20(GRCh37):g.62065225_62065226del	NM_172107.2:c.1054_1055del	p.(Ser352fs)	heterozygous, maternal
208	SNV/Indel	COL1A2	AD	Chr7(GRCh37):g.94049721G>T	NM_000089.3:c.2152G>T	p.(Gly718Cys)	heterozygous, de novo
209	SNV/Indel	TK2	AR	Chr16(GRCh37):g.66565348G>A	NM_004614.4:c.310C>T	p.(Arg104Cys)	homozygous
210	SNV/Indel	NIPBL	AD	Chr5(GRCh37):g.37020594C>T	NM_133433.3:c.5044C>T	p.(Arg1682*)	heterozygous, de novo
211	SNV/Indel	TCOF1	AD	Chr5(GRCh37):g.149776281dup	NM_001135243.1:c.4218dup	p.(Ser1407fs)	heterozygous
225	SNV/Indel	KMT2D	AD	Chr12(GRCh37):g.49435488G>A	NM_003482.3:c.6184C>T	(p.(Gln2062*)	heterozygous, de novo
227	SNV/Indel	TPM2	AD	Chr9(GRCh37):g.35685506_35685508del	NM_003289.3:c.415_417del	p.(Glu139del)	heterozygous, de novo
229	SNV/Indel	GARS	AD	Chr7(GRCh37):g.30668181G>A	NM_002047.2:c.1705G>A	p.(Glu569Lys)	heterozygous, de novo
230	SNV/Indel	ASXL2	AD	Chr2(GRCh37):g.25972585G>A	NM_018263.5:c.1840C>T	p.(Arg614*)	heterozygous, de novo
231	SNV/Indel	PIEZO2	AD	Chr18(GRCh37):g.10742602A>C	NM_022068.2:c.4451T>G	p.(Ile1484Ser)	heterozygous, de novo
235	SNV/Indel	CYP27B1	AR	Chr12(GRCh37):g.58160654dup	NM_000785.3:c.171dup	p.(Leu58fs)	homozygous
236	SNV/Indel	SCN2A	AD	Chr2(GRCh37):g.166166916G>A	NM_021007.2:c.781G>A	p.(Val261Met)	heterozygous, de novo
237	SNV/Indel	PPM1D	AD	Chr17(GRCh37):g.58740836C>T	NM_003620.3:c.1741C>T	p.(Arg581*)	heterozygous, de novo
244	SNV/Indel	SMAD3	AD	Chr15(GRCh37):g.67477073G>A	NM_005902.3:c.880G>A	p.(Val294Met)	heterozygous, de novo
247	SNV/Indel	PTPN11	AD	Chr12(GRCh37):g.112888312G>A	NM_002834.3:c.328G>A	p.(Glu110Lys)	heterozygous, paternal
254	SNV/Indel	CHD3	AD	Chr17(GRCh37):g.7804647T>C	NM_001005271.2:c.3383T>C	p.(Leu1128Pro)	heterozygous, de novo
258	SNV/Indel	FGFR3	AD	Chr4(GRCh37):g.1808989A>C	NM_000142.4:c.2421A>C	p.(*807Cys)	heterozygous, de novo
259	SNV/Indel	SCN3A	AD	Chr2(GRCh37):g.165986748A>G	NM_006922.3:c.2624T>C	p.(Ile875Thr)	heterozygous, de novo
268	SNV/Indel	MECP2	XL	ChrX(GRCh37):g.153297816_153297826del	NM_004992.3:c.209_219del	p.(Ser70fs)	hemizygous, de novo
262*	SNV/Indel	ALPL ABCC9	AR AD	Chr1(GRCh37):g.21889687G>A Chr12(GRCh37):g.21997771A>G	NM_000478.5:c.382G>A NM_005691.2:c.3175T>C	p.(Val128Met) p.(Trp1059Arg)	homozygous heterozygous, de novo
264	SNV/Indel	CREBBP	AD	Chr16(GRCh37):g.3781900del	NM_004380.2:c.4767del	p.(Asn1589fs)	heterozygous, de novo
266	SNV/Indel	SCN2A	AD	Chr2(GRCh37):g.166201144T>C	NM_021007.2:c.2642T>C	p.(Leu881Pro)	heterozygous, de novo
97	SNV/Indel	FGD1	XL	ChrX(GRCh37):g.54491964C>T	NM_004463.2:c.1556G>A	p.(Arg519His)	hemizygous, maternal
275	SNV/Indel	MYH3	AR	Chr17(GRCh37):g.10549057G>A Chr17(GRCh37):g.10559406C>T	NM_002470.3:c.1108C>T NM_002470.3:c.-9+1G>A	p.(Arg370*) r.spl?	heterozygous, maternal heterozygous, paternal
276	SNV/Indel	PRF1	AR	Chr10(GRCh37):g.72358622_72358624del	NM_005041.5:c.853_855del	p.(Lys285del)	homozygous
285	SNV/Indel	CEP290	AR	Chr12(GRCh37):g.88471040C>A	NM_025114.3:c.5668G>T	p.(Gly1890*)	homozygous
289	SNV/Indel	AMT	AR	Chr3(GRCh37):g.49456724C>T	NM_000481.3:c.665G>A	p.(Arg222His)	homozygous
292	SNV/Indel	KCNQ2	AD	Chr20(GRCh37):g.62070004G>A	NM_172107.3:c.997C>T	p.(Arg333Trp)	heterozygous, de novo
295	SNV/Indel	FOXG1	AD	Chr14(GRCh37):g.29237138A>C	NM_005249.4:c.653A>C	p.(Tyr218Ser)	heterozygous, de novo
301	SNV/Indel	HRAS	AD	Chr11(GRCh37):g.533851_533877dup	NM_005343.2:c.179_205dup	p.(Gly60_Arg68dup)	heterozygous, de novo
306	SNV/Indel	RASA1	AD	Chr5(GRCh37):g.86564795del	NM_002890.2:c.527del	p.(Pro176fs)	heterozygous, de novo
309	SNV/Indel	CEP290	AR	Chr12(GRCh37):g.88514773C>T Chr12(GRCh37):g.88471122C>G	NM_025114.3:c.1359+1G>A NM_025114.3:c.5587-1G>C	r.spl? r.spl?	heterozygous, paternal heterozygous, maternal
312	SNV/Indel	KCNQ2	AD	Chr20(GRCh37):g.62076674C>T	NM_172107.3:c.431G>A	p.(Arg144Gln)	heterozygous, de novo
318	SNV/Indel	GATAD2B	AD	Chr1(GRCh37):g.153791298_153791299del	NM_020699.2:c.565_566del	p.(Gln190fs)	heterozygous, de novo
323	SNV/Indel	SURF1	AR	Chr9(GRCh37):g.136219623T>C	NM_003172.3:c.516-2A>G	p.(?)	homozygous
325	SNV/Indel	PTPN11	AD	Chr12(GRCh37):g.112888165G>A	NM_002834.4:c.181G>A	p.(Asp61Asn)	heterozygous, de novo
328	SNV/Indel	FLNC	AD	Chr7(GRCh37):g.128493805G>A	NM_001458.4:c.6398G>A	p.(Arg2133His	heterozygous, de novo
333	SNV/Indel	RUNX2	AD	Chr6(GRCh37):g.45514563G>A	NM_001024630.3:c.1088-1G>A	r.spl?	heterozygous (transmission from mosaic mother)
336	SNV/Indel	KDM5B	AD	Chr1(GRCh37):g.202710667G>A	NM_001314042.1:c.2881C>T	p.(Gln961*) / r.spl?	heterozygous, de novo
338	SNV/Indel	PEX7	AR	Chr6(GRCh37):g.137219351T>A	NM_000288.3:c.875T>A	p.(Leu292*)	homozygous
352	SNV/Indel	COL11A2	AR	Chr6(GRCh37):g.33138132G>A Chr6(GRCh37):g.33135610C>A	NM_080680.2:c.3553C>T NM_080680.2:c.3980G>T	p.(Arg1185*) p.(Gly1327Val)	heterozygous, paternal heterozygous, maternal
353	SNV/Indel	CASR	AR	Chr3(GRCh37):g.121980868_121980876del	NM_000388.3:c.986_994del	p.(Gly329_Arg331del)	homozygous
357	SNV/Indel	CCBE1	AR	Chr18(GRCh37):g.57115306_57115307insA Chr18(GRCh37):g.57106986C>T	NM_133459.3:c.683_684insT NM_133459.3:c.838G>A	p.(Leu229Profs) p.(Gly280Ser)	heterozygous, paternal heterozygous, maternal
361	SNV/Indel	FGFR3	AD	Chr4(GRCh37):g.1806119G>A	NM_000142.4:c.1138G>A	p.Gly380Arg	heterozygous, de novo
362	SNV/Indel	RRAGC	AD	Chr1(GRCh37):g.39322639G>A	NM_022157.3:c.353C>T	p.(Pro118Leu)	heterozygous, de novo
363	SNV/Indel	PEX7	AR	Chr6(GRCh37):g.137191088C>T Chr6(GRCh37):g.137219380G>C	NM_000288.3:c.694C>T NM_000288.3:c.903+1G>C	p.(Arg232*) r.spl?	heterozygous, maternal heterozygous, paternal
364	SNV/Indel	COL1A1	AD	Chr17(GRCh37):g.48273524C>G	NM_000088.3:c.994G>C	p.(Gly332Arg)	heterozygous, de novo
367	SNV/Indel	COL2A1	AD	Chr12(GRCh37):g.48378803C>T	NM_001844.4:c.1808G>A	p.(Gly603Asp)	heterozygous, de novo
371	SNV/Indel	COL2A1	AD	Chr12(GRCh37):g.48369754C>T	NM_001844.4:c.3589G>A	p.(Gly1197Ser)	heterozygous, de novo
375	SNV/Indel	NEXN	AR	Chr1(GRCh37):g.78399087C>T	NM_144573.3:c.1174C>T	p.(Arg392*)	homozygous
383	SNV/Indel	FGFR3	AD	Chr4(GRCh37):g.1803568C>G	NM_000142.4:c.746C>G	p.(Ser249Cys)	heterozygous
398	SNV/Indel	ZEB2	AD	Chr2(GRCh37):g.145156878_145156879insA	NM_014795.3:c.1875_1876insT	p.(Gly626fs)	heterozygous, de novo
399	SNV/Indel	FLNB	AD	Chr3(GRCh37):g.58129326G>T	NM_001457.3:c.5411G>T	p.(Gly1804Val)	heterozygous, de novo
403	SNV/Indel	NKX2-5	AD	Chr5(GRCh37):g.172662022T>C	NM_004387.3:c.65A>G	p.(Gln22Arg)	heterozygous, paternal
410	SNV/Indel	PEX6	AR	Chr6(GRCh37):g.42946072_42946075dup	NM_000287.3:c.814_817dup	p.(Val273fs)	homozygous
412	SNV/Indel	HCN4	AD	Chr15(GRCh37):g.73621988A>T	NM_005477.2:c.1516T>A	p.(Tyr506Asn)	heterozygous, maternal
414	SNV/Indel	ARID1B	AD	Chr6(GRCh37):g.157222609dup	NM_020732.3:c.1876dup	p.(Gln626fs)	heterozygous, de novo
417	SNV/Indel	DNM1L	AD	Chr12(GRCh37):g.32884296C>T	NM_012062.3:c.1207C>T	p.(Arg403Cys)	heterozygous
419	SNV/Indel	COL1A2	AD	Chr7(GRCh37):g.94042422G>A	NM_000089.3:c.1531G>A	p.(Gly511Ser)	heterozygous, de novo
423	SNV/Indel	FGFR3	AD	Chr4(GRCh37):g.1808987T>G	NM_000142.4:c.2419T>G	p.(*807Gly)	heterozygous, de novo
425	SNV/Indel	NIPBL	AD	Chr5(GRCh37):g.36961657C>T	NM_133433.3:c.430C>T	p.(Gln144*)	heterozygous, de novo
427	SNV/Indel	GP1BA	AD	Chr17(GRCh37):g.4836254dup	NM_000173.5:c.355dup	p.(Thr119fs)	heterozygous, de novo
429	SNV/Indel	KDM2B	AD	Chr12(GRCh37):g.121891053C>G	NM_032590.4:c.1829G>C	p.(Arg610Pro)	heterozygous, de novo
431	SNV/Indel	SOS1	AD	Chr2(GRCh37):g.39224464G>C	NM_005633.3:c.2894C>G	p.(Ala965Gly)	heterozygous, de novo
437	SNV/Indel	COL1A1	AD	Chr17(GRCh37):g.48268806C>T	NM_000088.3:c.2173G>A	p.(Gly725Ser)	heterozygous, de novo
525	SNV/Indel	FGD1	XL	ChrX(GRCh37):g.54494229C>T	NM_004463.2:c.1328G>A	p.(Arg443His)	hemizygous, maternal
448	SNV/Indel	ARID1B	AD	Chr6(GRCh37):g.157527328G>T	NM_020732.3:c.5053G>T	p.(Glu1685*)	heterozygous, de novo
454	SNV/Indel	GDF1	AR	Chr19(GRCh37):g.18979917C>T	NM_001492.5:c.608G>A	p.(Trp203*)	homozygous
455	SNV/Indel	KCNB1	AD	Chr20(GRCh37):g.47990875G>A	NM_004975.3:c.1222C>T	p.(Pro408Ser)	heterozygous, de novo
459	SNV/Indel	BAZ2B	AD	Chr2(GRCh37):g.160193447_160193450del	NM_013450.3:c.5796+3_5796+6del	r.spl?	heterozygous, de novo
463	SNV/Indel	KRAS	AD	Chr12(GRCh37):g.25380300_25380309delinsCAGAGACAGC	NM_033360.3:c.149_158delinsGCTGTCTCTG	p.(Thr50_Leu53delinsSerCysLeuTrp)	heterozygous, de novo
468	SNV/Indel	IRF6	AD	Chr1(GRCh37):g.209961959C>T	NM_006147.3:c.1210G>A	p.(Glu404Lys)	heterozygous, de novo
470	SNV/Indel	LTBP2	AR	Chr14(GRCh37):g.75022332G>A	NM_000428.2:c.895C>T	p.(Arg299*)	homozygous
477	SNV/Indel	FGFR3	AD	Chr4(GRCh37):g.1806119G>A	NM_000142.4:c.1138G>A	p.(Gly380Arg)	heterozygous, de novo
67	SNV/Indel	FLNA	XL	ChrX(GRCh37):g.153583251dup	NM_001456.3:c.5135dup	p.(Tyr1712*)	heterozygous, de novo
484	SNV/Indel	PTPN11	AD	Chr12(GRCh37):g.112926909A>G	NM_002834.3:c.1529A>G	p.(Gln510Arg)	heterozygous, de novo
487	SNV/Indel	FGFR3	AD	Chr4(GRCh37):g.1807371C>G	NM_000142.4:c.1620C>G	p.Asn540Lys	heterozygous, de novo
493	SNV/Indel	NF1	AD	Chr17(GRCh37):g.29553492C>T	NM_000267.3:c.2041C>T	p.(Arg681*)	heterozygous
498	SNV/Indel	FGF12	AD	Chr3(GRCh37):g.192053230C>T	NM_021032.4:c.334G>A	p.(Gly112Ser)	heterozygous, de novo
499	SNV/Indel	SRD5A3	AR	Chr4(GRCh37):g.56212532C>A	NM_024592.4:c.29C>A	p.(Ser10*)	homozygous
500	SNV/Indel	PACS2	AD	Chr14(GRCh37):g.105834434G>A	NM_001100913.2:c.610G>A	p.(Glu204Lys)	heterozygous, de novo
502	SNV/Indel	SBDS	AR	Chr7(GRCh37):g.66459197A>G Chr7(GRCh37):g.66456122dup	NM_016038.2:c.258+2T>C NM_016038.2:c.624+2dup	r.spl? r.spl?	heterozygous heterozygous, paternal
507	SNV/Indel	KCNQ2	AD	Chr20(GRCh37):g.62071018G>A	NM_172107.3:c.860C>T	p.(Thr287Ile)	heterozygous
510	SNV/Indel	SHOC2	AD	Chr10(GRCh37):g.112745488A>G	NM_007373.3:c.806A>G	p.(Gln269Arg)	heterozygous (transmission from mosaic mother)
260	SNV/Indel	PCDH19	XL	ChrX(GRCh37):g.99662806C>A	NM_001184880.1:c.790G>T	p.(Asp264Tyr)	heterozygous, de novo
523	SNV/Indel	CDKL5	XL	ChrX(GRCh37):g.18622886T>A	NM_003159.2:c.1842T>A	p.(Tyr614*)	heterozygous, de novo
529	SNV/Indel	COL1A2	AD	Chr7(GRCh37):g.94039805G>T	NM_000089.3:c.1163G>T	p.(Gly388Val)	heterozygous, de novo
530	SNV/Indel	KAT6B;	AD	Chr10(GRCh37):g.76784999del	NM_012330.3:c.3656del	p.(Pro1219fs)	heterozygous, de novo
534	SNV/Indel	COL2A1	AD	Chr12(GRCh37):g.48379984C>T	NM_001844.4:c.1527+135G>A	p.(?)	heterozygous, de novo
537	SNV/Indel	CC2D2A	AR	Chr4(GRCh37):g.15575922_15575925dup Chr4(GRCh37):g.15569105G>C	NM_001080522.2:c.3744_3747dup NM_001080522.2:c.3288G>C	p.(Pro1250fs) p.(Gln1096His)	heterozygous, maternal heterozygous, paternal
540	SNV/Indel	LZTR1	AD	Chr22(GRCh37):g.21342301G>T	NM_006767.3(LZTR1):c.403G>T	p.(Gly135Cys)	heterozygous, de novo
546	SNV/Indel	TCF12 SMAD6	AD	Chr15(GRCh37):g.57555369_57555372del Chr15(GRCh37):g.66996390del	NM_207036.1:c.1642_1645del NM_005585.4:c.794del	p.(Glu548fs) p.(His265fs)	heterozygous, de novo heterozygous, maternal
549	CNV + SNV/Indel	RBM8A	AR	Chr1(GRCh37):g.145507646G>A seq[GRCh37] del(1)(q21.1q21.1); Chr18:g.(145368684_145386507)_(145748064_146020853)del	NM_005105.4:c.-21G>A gene deletion	p.(?) gene deletion	heterozygous, maternal heterozygous, paternal
555	SNV/Indel	PPOX	AD	Chr1(GRCh37):g.161137907T>C	NM_000309.4:c.461T>C	p.(Leu154Pro)	heterozygous
557	SNV/Indel	KIF7	AR	Chr15(GRCh37):g.90174836G>A	NM_198525.2:c.3001C>T	p.(Gln1001*)	homozygous
563	SNV/Indel	SOS1	AD	Chr2(GRCh37):g.39283845T>C	NM_005633.3:c.508A>G	p.(Lys170Glu)	heterozygous, de novo
567	SNV/Indel	ANKRD11	AD	Chr16(GRCh37):g.89341535C>T	NM_013275.5:c.7535G>A	p.(Arg2512Gln)	heterozygous, de novo
572	SNV/Indel	COL2A1	AD	Chr12(GRCh37):g.48379739C>T	NM_001844.4:c.1537G>A	p.(Gly513Ser)	heterozygous, de novo
*Individual with dual diagnosis
#PMID: 35977078

## Sheet: Supplementary Table 2_CNVs
Patient	Type of mutation	Gene	Mode of inheritance	Genomic (GRCh37)		Zygosity
18	CNV	multiple	AD	Seq[GRCh37] del(1)(p22.3p22.3); Chr1:g.(86558072_86578191)_(87380894_87458684)del Seq[GRCh37] del(1)(q31.2q32.2); Chr1:g.(193219035_196197301)_(200619865_200628116)del Seq[GRCh37] del(2)(q33.1q34); Chr2:g.(202010214_202013624)_(209436863_210517831)del		heterozygous, de novo heterozygous, de novo heterozygous, de novo
75	Aneuploidy	multiple	XL	45,X0		heterozygous, de novo
76	CNV	SMARCA	AD	Seq[GRCh37] del(9)(pterp24.1),dup(9)(p24.1p23); Chr9:g.pter_(8507485_8517835)del; Chr9:g.(8507485_8517835)_(13431261_13944283)dup		heterozygous, de novo heterozygous, de novo
103	CNV	NPHP1	AR	Seq[GRCh37] del(2)(q13q13); Chr2:g.(110350696_110880913)_(110962639_111395408)del		homozygous
115	CNV	multiple	AD	Seq[GRCh37] del(22)(q11.21q11.21); Chr22(GRCh37):g.(18899601_18900286)_(21414866_21799210)del		heterozygous, de novo
116	CNV	GNAO1	AD	Seq[GRCh37] dup(16)(q12.1q12.2); Chr16(GRCh37):g.(46617540_46617853)_(57017674_57054684)dup		heterozygous, de novo
124	CNV	RUNX1	AD	NM_001754.4:c.(?_526)_(654_?)del		heterozygous, de novo
134	CNV	FBN1	AD	Seq[GRCh37] dup(15)(q21.1-q21.1); Chr15(GRCh37):g.(48736857_48737572)_(48773977_48776014)dup		heterozygous
240	CNV	multiple	AD	Seq[GRCh37] del(5)(pterp15.33) Chr5:pter_(1632929-1708779)del		heterozygous, de novo
250	CNV	EHMT1	AD	Seq[GRCh37] del(9)(q34.3qter); Chr9:g.(140000740_140001105)_qterdel		heterozygous, de novo
331	CNV	multiple	AD	Seq[GRCh37] del(4)(p16.3p15.1) Chr4:g.pter_(31144430_36069560)del		heterozygous, de novo
386	CNV	DMD	XL	Seq[GRCh37] del(X)(p21.1p21.1); ChrX(GRCh37):g.(31986665_32053549)_(32383351_32398625)del		hemizygous, maternal
432	CNV	SON	AD	Seq[GRCh37] del(21)(q21.3q22.12); Chr21:g.(31066394_31311664)_(37537210_37571388)del		heterozygous, de novo
465	CNV	multiple	AD	Seq[GRCh37] del(4)(q13.1q21.23); Chr4:(62363081_62383011)_(86491865_86642987)del		heterozygous, de novo
476	CNV	multiple	AD	Seq[GRCh37]del(15)(q11.2q13.1); Chr15(GRCh37):g.(23330473_23684730)_(28544722_28632805)del		heterozygous, de novo
513	CNV	multiple	AD	Seq[GRCh37] del (6)(q25.3qter); Chr6:g.(160679774_160769454)_qter del		heterozygous, de novo
524	CNV	multiple	AD	Seq[GRCh37] dup(1)(q32.1q32.1); Chr16(GRCh37):g.(202934676_202934916)_(205886536_205887988)dup		heterozygous, de novo
532	CNV	multiple	AD	Seq[GRCh37] del(15)(q13.2q13.3); Chr15:g.(30337572_30502613)_(32460694_32620052)del		heterozygous, de novo
