# Supplementary material for: Lessons learned from rapid exome sequencing for 575 critically ill patients across the broad spectrum of rare disease
Source: Front Genet. 2024 Jan 8;14:1304520. doi: 10.3389/fgene.2023.1304520 (PMC10800954; doi:10.3389/fgene.2023.1304520)
Supplement: Supplementary file 2 [file Table3.XLSX]

## Sheet: Supplementary Table 3_SNVIndels
Patient ID	Type of mutation	Gene	Genomic (hg19)	cDNA	Protein effect	Zygosity
6	SNV	ACP5 MPL	Chr19(GRCh37):g.11688002G>A Chr1(GRCh37):g.43815009G>T	NM_001111035.1:c.131C>T NM_005373.2:c.1544G>T	p.(Thr44Met) p.(Trp515Leu)	heterozygous mosaic de novo (~10%)
16	SNV	RARS2	Chr6(GRCh37):g.88229358C>T Chr6(GRCh37):g.88226591C>T	NM_020320.3:c.1180G>A NM_020320.3:c.1519G>A	p.(Glu394Lys) p.(Glu507Lys)	heterozygous, maternal heterozygous, paternal
32	SNV	SLIT1	Chr10(GRCh37):g.98820403G>A	NM_003061.2:c.935C>T	p.(Thr312Met)	homozygous
39	SNV	SEC61A1	Chr3(GRCh37):g.127783720G>A	NM_013336.3:c.617G>A	p.(Gly206Glu)	heterozygous, de novo
43	SNV	PARN	Chr16(GRCh37):g.14721009G>A	NM_002582.3:c.281C>T	p.(Pro94Leu))	heterozygous, maternal
45	SNV	PBX1	Chr1(GRCh37):g.164776864G>A	NM_002585.3:c.787G>A	p.(Glu263Lys)	heterozygous
47	SNV	MYBPC3	Chr11(GRCh37):g.47364162C>T	NM_000256.3:c.1591G>A	p.(Gly531Arg)	heterozygous, maternal
51	SNV	ALG13	ChrX(GRCh37):g.111003141C>T	NM_001099922.2:c.3328C>T	p.(Gln1110*)	hemizygous, de novo
59	SNV	COL2A1	Chr12(GRCh37):g.48383018C>T	NM_001844.4:c.1115G>A	p.(Gly372Glu)	heterozygous
72	SNV	SOX13	Chr1(GRCh37):g.204093808C>A	NM_005686.2:c.1415C>A	p.(Pro472His)	heterozygous, de novo
78	SNV	KIF1B	Chr1(GRCh37):g.10434465C>T	NM_015074.3:c.4900C>T	p.(Arg1634*)	heterozygous, de novo
84	SNV	BRWD3	ChrX(GRCh37):g.79932269T>A	NM_153252.4:c.5248A>T	p.(Arg1750*)	hemizygous
86	SNV	MKL1	Chr22(GRCh37):g.40815086dup	NM_020831.4:c.1356dup	p.(Val453Argfs*16)	homozygous
102	SNV	TLN2	Chr15(GRCh37):g.63047839C>T	NM_015059.2:c.4585C>T	p.(Gln1529*)	heterozygous, de novo
110	SNV	RYR1	Chr19(GRCh37):g.38976730T>C Chr19(GRCh37):g.39058411A>G	NM_000540.2:c.5435T>C (p.(Leu1812Pro) NM_000540.2:c.13515-2A>G (r.spl?)	p.(Leu1812Pro) r.spl?	heterozygous, maternal heterozygous, paternal
151	SNV	CCND2	Chr12(GRCh37):g.4409165T>G	NM_001759.3:c.860T>G	p.(Ile287Ser)	heterozygous, de novo
152	SNV	HSD17B3	Chr9(GRCh37):g.99017146T>A	NM_000197.1:c.277+4A>T	(r.spl?)	heterozygous
155	SNV	FAT4	Chr4(GRCh37):g.126336294T>G Chr4(GRCh37):g.126370396C>T	NM_001291303.1:c.6176T>G NM_001291303.1:c.8231C>T	p.(Ile2059Ser) p.(Thr2744Ile)	heterozygous, paternal heterozygous, maternal
171	SNV	MTM1	ChrX(GRCh37):g.149826450G>A	NM_000252.2:c.1210G>A	p.(Glu404Lys)	hemizygous, maternal
182	SNV	FKRP	Chr19(GRCh37):g.47259888G>T	NM_001039885.2:c.1181G>T	p.(Trp394Leu)	homozygous
245	SNV	EFTUD2	Chr17(GRCh37):g.42942372G>A;	NM_001258353.1:c.1211C>T	p.(Thr404Met)	heterozygous, de novo
251	SNV	KIF26B	Chr1(GRCh37):g.245847534G>A;	NM_018012.4(KIF26B):c.2259-1G>A	(r.spl?)	heterozygous, de novo
256	SNV	JAK3	Chr19(GRCh37):g.17953972C>T; Chr19(GRCh37):g.17955108C>T	NM_000215.3:c.430G>A NM_000215.3:c.119G>A	p.(Asp144Asn) p.(Arg40His))	heterozygous, paternal heterozygous, maternal
279	SNV	ASNS	Chr7(GRCh37):g.97488195G>A;	NM_133436.3:c.746C>T	p.(Thr249Ile)	homozygous
305	SNV	HADH SNX15	Chr4(GRCh37):g.108954445G>A Chr11(GRCh37):g.64799966C>T	NM_001184705.2:c.874G>A NM_013306.4:c.199C>T	p.(Asp292Asn) p.(Arg67Cys)	heterozygous heterozygous, de novo
355	SNV	GNAS	Chr20(GRCh37):g.57429858C>T;	NM_080425.3:c.1538C>T;	p.(Ala513Val)	heterozygous
366	SNV	VARS2	Chr6(GRCh37):g.30888131C>T Chr6(GRCh37):g.30889951T>C	NM_001167734.1:c.1405C>T NM_001167734.1:c.1955T>C	p.(Arg469Trp) p.(Leu652Pro)	heterozygous, paternal heterozygous, maternal
388	SNV	RARS2	Chr6(GRCh37):g.88299650A>G Chr6(GRCh37):g.88240519A>T	NM_020320.4:c.26T>C NM_020320.4:c.754T>A	p.(Ile9Thr) p.(Tyr252Asn)	heterozygous, paternal heterozygous, maternal
418	SNV	ARSA	Chr22(GRCh37):g.51064656C>T;	NM_000487.5:c.905G>A	p.(Cys302Tyr) / r.spl?	homozygous
458	SNV	KCNQ2	Chr20(GRCh37):g.62070963_62070965del	NM_172107.3:c.913_915del	p.(Phe305del)	Mosaic de novo (~15%)
472	SNV	F8	ChrX(GRCh37):g.154250939C>T	NM_000132.3:c.-112G>A	p.(?)	hemizygous
501	SNV	DAG1	Chr3(GRCh37):g.49569259A>G;	NM_004393.5:c.1315A>G;	p.(Thr439Ala)	homozygous
541	SNV	MAP2K4	Chr17(GRCh37):g.11998934C>T;	NM_003010.3:c.436C>T	p.(Leu146Phe)	heterozygous, de novo
573	SNV	ABCA4	Chr1(GRCh37):g.94508412C>T Chr1(GRCh37):g.94496509C>T	NM_000350.2:c.3233G>A NM_000350.2:c.4253+43G>A	p.(Gly1078Glu) r.(spl?)	heterozygous heterozygous

## Sheet: Supplementary Table 3_CNVs
Patient ID	Type of mutation	Gene(s)	Genomic (GRCh37)	Zygosity
127	CNV	Multiple	Seq[GRCh37]dup(6)(q13q13); Chr6:g.(74530287_75794041)_(76024918_76063254)dup	heterozygous, de novo
144	CNV	Prader-Willi/Angelman locus	Seq[GRCh37] dup(15)(q11.1q13.1); chr15:g.(20777794_20874796)_(28544662_28632747)dup	heterozygous
302	CNV	OVOL2	Seq[GRCh37]dup(20)(p11.23p11.23); Chr20:g.(?_18005272)_(18038332_?)dup	heterozygous
562	CNV	OPHN1	Seq[CRCh37] dup(X)(q12q12); ChrX:g.(67339174_67412760)_(67454430_67502897)dup	heterozygous
