# Supplementary material for: Lessons learned from rapid exome sequencing for 575 critically ill patients across the broad spectrum of rare disease
Source: Front Genet. 2024 Jan 8;14:1304520. doi: 10.3389/fgene.2023.1304520 (PMC10800954; doi:10.3389/fgene.2023.1304520)
Supplement: Supplementary file 3 [file Table1.XLSX]

## Sheet: Suppl Table 1_Clinical details
Patient ID	Gender	Age (years)	Category	Gestational age	Period of gentic testing	Clinical features/ reason for rES	Total gene panel(s) requested	Requested gene panel(s)	Diagnosis?	Turnaround time (days)
1	Unspecified	n/a	Prenatal	19w6d	Prenatal	Suspect for skeletal dysplasia	2	Skeletal dysplasia and short stature; Mendeliome	conclusive	8.6425
2	Unspecified	n/a	Prenatal	15w6d	Prenatal	Hydrocephalus	2	Intellectual Disability; Mendeliome	no	8.33328
3	Male	31.4849	Adult (19-65 years)	n/a	Postneonatal	Intellectual disability, epilepsy	2	Epilepsy; Intellectual Disability	no	7
4	Unspecified	n/a	Prenatal	11w1d	Prenatal	Skeletal dysplasia	1	Skeletal dysplasia and short stature	conclusive	8
5	Unspecified	n/a	Prenatal	24w0d	Prenatal	Microcolon, megacystis, polyhydramnios	1	Mendeliome	no	8
6	Male	47.2	Adult (19-65 years)	n/a	Postneonatal	Myelofibrosis, essential thrombocythemia	2	Hemos; Immune disorders	possible	24
7	Male	6.94521	Child (6-12 years)	n/a	Postneonatal	Autism, neurodevelopmental delay	2	Intellectual Disability; Mendeliome	no	6
8	Unspecified	n/a	Prenatal	20w3d	Prenatal	Hydrops fetalis, akinesia, skeletal muscle atrophy	3	Skeletal dysplasia and short stature; Metabolic disorders; Mendeliome	no	14
9	Female	13.6137	Adolescence (13-18 years)	n/a	Postneonatal	Muscle weakness	1	Mendeliome	no	20
10	Unspecified	n/a	Prenatal	31w0d	Prenatal	Complex abnormality of brain morphology	4	Ciliopathies; Epilepsy; Intellectual Disability; Oxphos	conclusive	56
11	Unspecified	n/a	Prenatal	21w0d	Prenatal	Congenital diaphragmatic hernia, hydrops fetalis	1	Mendeliome	conclusive	7
12	Unspecified	n/a	Prenatal	unknown	Prenatal	Facial dysmorphism, suspect for Pierre-Robin sequence	3	Cranio Facial Anomalies; Intellectual Disability; Mendeliome	no	7
13	Male	11.8959	Child (6-12 years)	n/a	Postneonatal	Intellectual disability, epilepsy, autism	4	Movement disorder; Epilepsy; Metabolic disorders; Intellectual Disability	no	8
14	Unspecified	n/a	Prenatal	11w3d	Prenatal	Bilateral radial aplasia, thickened nuchal skin fold	1	Mendeliome	no	7.50016
15	Female	0.172603	Infant (1-23 months)	n/a	Postneonatal	Trombocytopenia, hydronephrosis, facial dysmorphism, esophageal atresia	1	Mendeliome	no	11
16	Male	0.216438	Infant (1-23 months)	n/a	Postneonatal	Motor delay, central apnea, dystonia, epileptic encephalopathy	2	Movement disorder; Epilepsy	possible	22
17	Female	0.139726	Newborn	n/a	Neonatal	Facial dysmorphism, micrognathia, choanal atresia	1	Mendeliome	conclusive	10
18	Unspecified	n/a	Prenatal	21w0d	Prenatal	Inlet ventricular septal defect, single umbilical artery, polyhydramnios, facial dysmorphism	1	Mendeliome	conclusive	10.5008
19	Female	0.030137	Newborn	n/a	Neonatal	Intellectual disablity, large for gestational age, persistent left superior vena cava	1	Mendeliome	no	8
20	Female	0.178082	Infant (1-23 months)	n/a	Postneonatal	Microcephaly, cleft palate, facial dysmorphism, brachydactyly, failure to thrive, congenital heart defect, hyperinsulism	1	Mendeliome	conclusive	14
21	Female	0.0657534	Newborn	n/a	Neonatal	Rhabdoid tumor predisposition	1	Hereditary cancer	no	22
22	Male	0.261644	Infant (1-23 months)	n/a	Postneonatal	Mono kidney, single umbilical artery, trioventricular septal defect, bicuspid aortic valve,hemivertebrae, dysmorfism, laryngomalacia, polydactyly	1	Mendeliome	no	9
23	Male	0.208219	Infant (1-23 months)	n/a	Postneonatal	Epilepsy	1	Epilepsy	no	*
24	Unspecified	n/a	Prenatal	12w4d	Prenatal	Ambiguous genitalia, thickened nuchal skin fold	1	Mendeliome	no	13
25	Male	0.268493	Infant (1-23 months)	n/a	Postneonatal	Myelodysplasia	2	Immune disorders; Hereditary cancer	conclusive	29
26	Female	1.84384	Child, preschool (2-5 years)	n/a	Postneonatal	Acute myeloid leukemia	2	Immune disorders; Hereditary cancer	conclusive	29
27	Unspecified	n/a	Prenatal	20w0d	Prenatal	Ureteral duplication, coronary sinus enlargement, hemivertebrae, choroid plexus cyst	1	Mendeliome	no	9
28	Male	5.69589	Child (6-12 years)	n/a	Postneonatal	Epilepsy	2	Epilepsy; Oxphos	no	14
29	Male	0.438356	Infant (1-23 months)	n/a	Postneonatal	Epilepsy	1	Epilepsy	no	13
30	Unspecified	n/a	Prenatal	unknown	Prenatal	Intrauterine growth retardation, abnormality of the brain	1	Mendeliome	no	10
31	Male	1.0137	Infant (1-23 months)	n/a	Postneonatal	Congenital neutropenia	1	Immune disorders	no	14
32	Female	0.0136986	Newborn	n/a	Neonatal	Agenesis of corpus callosum, axial hypotonia, hearing impairment	2	Metabolic disorders; Oxphos	possible	14
33	Female	0.145205	Infant (1-23 months)	n/a	Postneonatal	Epilepsy	1	Epilepsy	conclusive	7
34	Unspecified	n/a	Prenatal	20w6d	Prenatal	Congenital hernia diafragmatica	1	Mendeliome	no	14
35	Male	0.164384	Infant (1-23 months)	n/a	Postneonatal	Neonatal epilepsy	1	Epilepsy	conclusive	9
36	Female	0.53242	Infant (1-23 months)	n/a	Postneonatal	Obstructive cardiomyopathy, microcephalus, congenital hip dislocation, stridor, neutropenia, nystagmus	1	Oxphos	no	22.6667
37	Male	16.9534	Adolescence (13-18 years)	n/a	Postneonatal	Abnormal pulmonary interstitial morphology, short stature, cryptorchidism	1	Immune disorders	no	19
38	Unspecified	n/a	Prenatal	unknown	Prenatal	Scoliosis, ventricular septal defect, abnormality of the bladder	1	Mendeliome	no	14
39	Unspecified	n/a	Prenatal	unknown	Prenatal	Duodenal atresia, atresia of the rectum, atresia of larynx, bilateral cleft palate	1	Mendeliome	possible	9
40	Unspecified	n/a	Prenatal	21w1d	Prenatal	Atrioventricular canal defect, hypoplastic aortic arch, polydactyly, skeletal dysplasia	2	Ciliopathies; Mendeliome	no	14
41	Male	16.6055	Adolescence (13-18 years)	n/a	Postneonatal	Autistic behavior, global developmental delay, polyneuropathy, acute lymphoblastic leukemia	1	Dyskeratosis Congenita	no	11
42	Male	0.0356164	Newborn	n/a	Neonatal	Microcephaly, bilateral cleft palate, retrognathia, anorectal anomaly, facial dysmorphism	1	Mendeliome	no	9
43	Male	0.747945	Infant (1-23 months)	n/a	Postneonatal	Pancytopenia, acute myeloid leukemia, undergrowth	1	Immune disorders	possible	22
44	Female	17.2658	Adolescence (13-18 years)	n/a	Postneonatal	Relapse leukemia, thrombocytopenia	2	Immune disorders; Hereditary cancer	no	10
45	Female	0.956164	Infant (1-23 months)	n/a	Postneonatal	Bilateral hydronephrosis, feeding difficulties, hypotonia, respiratory tract infections	2	Mendeliome; Muscle disorder	possible	7
46	Unspecified	n/a	Prenatal	20w0d	Prenatal	Height less than 3rd percentile, small thorax, pulmonary insufficiency	2	Skeletal dysplasia and short stature; Mendeliome	no	10
47	Female	0.106849	Infant (1-23 months)	n/a	Postneonatal	Hypertrophic cardiomyopathy	1	Mendeliome	possible	12
48	Female	0.0136986	Newborn	n/a	Neonatal	Macroglossia, cyst neck, facial dysmorphism	1	Mendeliome	no	8
49	Male	0.00547945	Newborn	n/a	Neonatal	Small for gestional age, retrognthia, hypospadias, single umbilical artery, shortened limbs	1	Mendeliome	no	11
50	Unspecified	n/a	Prenatal	unknown	Prenatal	Encephalocele	1	Mendeliome	no	14
51	Female	0.0164384	Newborn	n/a	Neonatal	Anorectal anomaly, rocker bottom foot, abnormality of the ear and feet	1	Mendeliome	possible	35
52	Unspecified	n/a	Prenatal	unknown	Prenatal	Skeletal dysplasia	1	Skeletal dysplasia and short stature	no	14
53	Male	1.75342	Child, preschool (2-5 years)	n/a	Postneonatal	Epilepsy, hepatomegaly, neurodevelopmental delay	3	Epilepsy; Intellectual Disability; Oxphos	no	11
54	Female	5.11781	Child, preschool (2-5 years)	n/a	Postneonatal	Essential thrombocythemia	1	Hemos	no	17
55	Unspecified	n/a	Prenatal	unknown	Prenatal	Rocker bottom foot, horseshoe kidney, intrauterine growth retardation, hand clenching	1	Mendeliome	conclusive	28
56	Female	31.411	Adult (19-65 years)	n/a	Postneonatal	Limb-girdle muscle weakness	1	Muscle disorder	no	27
57	Male	21.8262	Adult (19-65 years)	n/a	Postneonatal	Abnormality of the lymphatic system, multiple bony cystic lesions	3	Immune disorders; Mendeliome; Immune disorders	no	14.4227
58	Unspecified	n/a	Prenatal	unknown	Prenatal	Macrosomia, unilateral palatoschisis	1	Mendeliome	no	7
59	Unspecified	n/a	Prenatal	unknown	Prenatal	Short fetal femur length, short fetal humerus length, macrocephaly	1	Skeletal dysplasia and short stature	possible	13
60	Male	0.0273973	Newborn	n/a	Neonatal	Secretory diarrhea	2	Immune disorders; Mendeliome	no	7
61	Female	0.00547945	Newborn	n/a	Neonatal	Seizures, facial dysmorphism, congenital heart abnormality, toe syndactyly, renal insufficiency	1	Mendeliome	conclusive	7
62	Male	36.5288	Adult (19-65 years)	n/a	Postneonatal	Pheochromocytoma, hyperthyroidism, hepatic hemangioma	1	Hereditary cancer	no	26
63	Female	0.00273973	Newborn	n/a	Neonatal	Hypertelorism, facial dysmorphism, hydrops fetalis, cardiomyopathy, vascular malformation	1	Mendeliome	no	8
64	Female	0.0767123	Newborn	n/a	Neonatal	Small for gestational age, laryngomalacia, congenital knee dislocation, abnormality of the outer ear	1	Mendeliome	no	9
65	Female	29.3178	Adult (19-65 years)	n/a	Postneonatal	Severe neurodevelopmental delay	1	Intellectual Disability	no	15
66	Male	0.0164384	Newborn	n/a	Neonatal	Respiratory insufficiency, abnormal heart morphology, abnormally shaped skull, facial dysmorphism	2	Metabolic disorders; Mendeliome	no	12
67	Female	0.0219178	Newborn	n/a	Neonatal	Pectus excavatum, large for gestational age, cheilo/palato/gnathoschisis,	1	Mendeliome	conclusive	10
68	Male	0.0109589	Newborn	n/a	Neonatal	Macrocephaly, agenesis corpus callosum, aplasia/hypoplasia of the cerebellar vermis	1	Mendeliome	no	7
69	Female	0.00821918	Newborn	n/a	Neonatal	Macrosomia, hydrops fetalis, fetal hydrothorax	2	Metabolic disorders; Mendeliome	no	7
70	Female	0.180822	Infant (1-23 months)	n/a	Postneonatal	Epilepsy	2	Epilepsy; Intellectual Disability	conclusive	27
71	Unspecified	n/a	Prenatal	20w5d	Prenatal	Congenital heart defect, height less than 3rd percentile, small long bones	2	Skeletal dysplasia and short stature; Mendeliome	no	9.3083
72	Female	0.134247	Infant (1-23 months)	n/a	Postneonatal	Epilepsy	2	Epilepsy; Intellectual Disability	possible	13
73	Unspecified	n/a	Prenatal	19w6d	Prenatal	Thickened nuchal skin fold, ebstein anomaly, thickened nuchal skin fold	2	Mendeliome; Rasopathies	conclusive	10
74	Unspecified	n/a	Prenatal	unknown	Prenatal	Long bones, sandal gap, small thorax	1	Skeletal dysplasia and short stature	conclusive	7
75	Female	0.00821918	Newborn	n/a	Neonatal	Congenital diaphragmatic hernia, facial dysmorphism, lymphedema	1	Mendeliome	conclusive	14
76	Female	1.28767	Infant (1-23 months)	n/a	Postneonatal	Motor delay, abnormality of vision, hip dysplasia, alpha-1-antitrypsin deficiency	4	Metabolic disorders; Intellectual Disability; Oxphos; Muscle disorder	conclusive	10
77	Male	0.0109589	Newborn	n/a	Neonatal	Congenital heartdefect (VSD), facial dysmorphism, small for gestational age, epilepsy, periorbital edema	1	Mendeliome	conclusive	8
78	Unspecified	n/a	Prenatal	20w6d	Prenatal	Feeding difficulties, short fetal femur length, unilateral anophthalmia	4	Visual impairment; Disorder of Sex differentiation; Skeletal dysplasia and short stature; Mendeliome	possible	11
79	Male	2.2411	Child, preschool (2-5 years)	n/a	Postneonatal	Suspect for trisomy 21, epilepsy	1	Epilepsy	no	20
80	Male	0.191781	Infant (1-23 months)	n/a	Postneonatal	Epilepsy, hypertonia, opisthotonus	4	Epilepsy; Metabolic disorders; Intellectual Disability; Mendeliome	conclusive	9
81	Female	0.323288	Infant (1-23 months)	n/a	Postneonatal	Epileptic spasm, global developmental delay	2	Epilepsy; Intellectual Disability	conclusive	11
82	Male	0.383562	Infant (1-23 months)	n/a	Postneonatal	Facial dysmorphism, paroxysmal atrial tachycardia, bronchopulmonary dysplasia	1	Mendeliome	conclusive	33
83	Female	1.3589	Infant (1-23 months)	n/a	Postneonatal	Severe global developmental delay	1	Intellectual Disability	conclusive	11
84	Male	0.90137	Infant (1-23 months)	n/a	Postneonatal	Macrocephaly, cheilo/gnatho/palatoschisis, hypospadias, facial dysmorphism, feet syndactyly	1	Mendeliome	possible	9
85	Female	0.00273973	Newborn	n/a	Neonatal	Congenital heart defect	1	Mendeliome	no	11
86	Male	0.10137	Infant (1-23 months)	n/a	Postneonatal	Hydronephrosis, small thorax, micropenis, respiratory failure requiring assisted ventilation	1	Mendeliome	possible	10
87	Female	0.10137	Infant (1-23 months)	n/a	Postneonatal	Cardiac rhabdomyoma	2	Mendeliome; Hereditary cancer	no	13
88	Female	0.30137	Infant (1-23 months)	n/a	Postneonatal	Suspect for tuberous sclerosis	1	Epilepsy	conclusive	12
89	Female	0.128767	Infant (1-23 months)	n/a	Postneonatal	Abnormal ear shape, butterfly vertebra, 13 pairs of ribs plus 3rd rib is forked, uterus didelphys, double urinary system bilateral, anteriorly displaced anus	1	Mendeliome	no	8
90	Unspecified	n/a	Prenatal	21w5d	Prenatal	Suspect for skeletal dysplasia	1	Skeletal dysplasia and short stature	conclusive	12
91	Female	0.00821918	Newborn	n/a	Neonatal	Macrocephaly, facial dysmorphism, small thorax, anteriorly displaced anus	1	Mendeliome	conclusive	10
92	Female	1.71507	Child, preschool (2-5 years)	n/a	Postneonatal	Epilepsy	1	Epilepsy	no	8
93	Unspecified	n/a	Prenatal	28w6d	Prenatal	Short stature, hypospadias, kidney stones, bronchodysplasia	1	Skeletal dysplasia and short stature	no	10
94	Male	0.0876712	Infant (1-23 months)	n/a	Postneonatal	Respiratory insufficiency, rocker bottom feet	2	Immune disorders; Mendeliome	no	7
95	Male	0.0136986	Newborn	n/a	Neonatal	Abnormal heart morphology	1	Mendeliome	no	9
96	Female	0.10411	Infant (1-23 months)	n/a	Postneonatal	Respiratory distress	1	Mendeliome	no	7
97	Male	1.84777	Child, preschool (2-5 years)	n/a	Postneonatal	Microcephaly, short stature, unilateral cleft palate, unilateral cleft lip, facial dysmorphism	1	Cranio Facial Anomalies	conclusive	20.5633
98	Female	0.123288	Infant (1-23 months)	n/a	Postneonatal	Epilepsy	2	Epilepsy; Metabolic disorders	no	7
99	Unspecified	n/a	Prenatal	unknown	Prenatal	Severe short stature	1	Skeletal dysplasia and short stature	conclusive	12
100	Unspecified	n/a	Prenatal	25w2d	Prenatal	Polycystic kidney dysplasia, anhydramnios	1	Renal disorders	conclusive	12
101	Male	0.547945	Infant (1-23 months)	n/a	Postneonatal	Seizure	1	Epilepsy	conclusive	11
102	Female	0.0438356	Newborn	n/a	Neonatal	Sacrococcygeal teratoma	1	Mendeliome	possible	6
103	Female	10.9781	Child (6-12 years)	n/a	Postneonatal	Nystagmus, abnormal lung morphology, abnormal heart morphology, renal insufficiency	3	Visual impairment; Ciliopathies; Renal disorders	conclusive	7
104	Female	0.0191781	Newborn	n/a	Neonatal	Hydrops fetalis, chylothorax	2	Metabolic disorders; Mendeliome	conclusive	7
105	Unspecified	n/a	Prenatal	37w4d	Prenatal	Brachyturricephaly, lobar holoprosencephaly, proptosis, abnormal foot morphology, irregularity of vertebral body	2	Cranio Facial Anomalies; Mendeliome	conclusive	9
106	Male	0.00273973	Newborn	n/a	Neonatal	Tetralogy of Fallot, glandular hypospadias, abnormally posteriorly rotated ears, abnormal toes	1	Mendeliome	no	7
107	Unspecified	n/a	Prenatal	21w1d	Prenatal	Skeletal dysplasia, brachycephaly, thoracic hypoplasia	1	Skeletal dysplasia and short stature	conclusive	10
108	Male	0.0219178	Newborn	n/a	Neonatal	Hypertonia, facial dysmorphism, respiratory insufficiency	1	Muscle disorder	conclusive	7
109	Female	0.331507	Infant (1-23 months)	n/a	Postneonatal	Congenital hypothyroidism, cholestasis, atrial septal defect, respiratory insufficiency	2	Intellectual Disability; Mendeliome	no	9
110	Female	0.00821918	Newborn	n/a	Neonatal	Flexion contracture, hypotonia	1	Muscle disorder	possible	10
111	Male	2.49041	Child, preschool (2-5 years)	n/a	Postneonatal	Eyelid myoclonia seizure, seizure	1	Epilepsy	no	17
112	Male	0.380822	Infant (1-23 months)	n/a	Postneonatal	Intellectual disability	3	Movement disorder; Metabolic disorders; Intellectual Disability	conclusive	10
113	Male	1.11781	Infant (1-23 months)	n/a	Postneonatal	Unknown	1	Oxphos	conclusive	*
114	Male	0.0219178	Newborn	n/a	Neonatal	Congenital heart defect, facial dysmorphism	2	Cardiac disorder; Mendeliome	no	8
115	Female	0.0219178	Newborn	n/a	Neonatal	Agenesis of kidney rechts, microcephaly, multicystic kidney dysplasia	2	Renal disorders; Mendeliome	conclusive	11
116	Male	1.45479	Infant (1-23 months)	n/a	Postneonatal	Hypotonia, seizure, neurodevelopmental delay	2	Epilepsy; Metabolic disorders	conclusive	14
117	Female	0.0328767	Newborn	n/a	Neonatal	Hypotonia, facial dysmorphism, hypoplasia of the nipples, clitoromegaly	2	Mendeliome; Muscle disorder	no	28
118	Unspecified	n/a	Prenatal	unknown	Prenatal	Shortened limbs, scoliosis, talipes equinovarus, micrognathia, polyhydramnios	1	Skeletal dysplasia and short stature	conclusive	8
119	Unspecified	n/a	Prenatal	20w1d	Prenatal	Abnormality of brain morphology, congenital heart defect (VSD), single umbilical artery	1	Mendeliome	no	7
120	Male	14.8411	Adolescence (13-18 years)	n/a	Postneonatal	Pancytopenia, autistic behavior	3	Dyskeratosis Congenita; Hemos; Mendeliome	no	14
121	Female	0.00547945	Newborn	n/a	Neonatal	Short thorax, short sternum	1	Mendeliome	no	7
122	Female	0.810959	Infant (1-23 months)	n/a	Postneonatal	Lymphoma	2	Immune disorders; Hereditary cancer	no	8
123	Male	0.00273973	Newborn	n/a	Neonatal	Hypotonia, dilated ventricles, thrombocytopenia, hepatomegaly, large fontanel, hydrocephalus	1	Mendeliome	conclusive	7
124	Male	0.0246575	Newborn	n/a	Neonatal	Trombocytopenia, anemia, facial dysmorphism	1	Hemos	conclusive	31
125	Female	1.76712	Child, preschool (2-5 years)	n/a	Postneonatal	Unknown	2	Metabolic disorders; Intellectual Disability	conclusive	11
126	Unspecified	n/a	Prenatal	unknown	Prenatal	Short tubular bones, polyhydramnios, foot deformity	1	Skeletal dysplasia and short stature	conclusive	7
127	Male	0.00547945	Newborn	n/a	Neonatal	Absent septum pellucidum, talipes equinovarus	2	Hemos; Mendeliome	possible	7
128	Unspecified	n/a	Prenatal	21w5d	Prenatal	Echogenic fetal bowel, unilateral renal cyst	1	Renal disorders	no	15
129	Female	3.53151	Child, preschool (2-5 years)	n/a	Postneonatal	Arachnoid cyst, hydrocephalus, retrocerebellar cyst	1	Mendeliome	no	7
130	Female	0.0109589	Newborn	n/a	Neonatal	Congenital diaphragmatic hernia , supernumerary ribs, facial dysmorphism, intellectual disability	1	Mendeliome	no	7
131	Unspecified	n/a	Prenatal	unknown	Prenatal	Arachnoid cysts	1	Mendeliome	no	7
132	Female	0.00547945	Newborn	n/a	Neonatal	Facial dysmorphism, Pierre-Robin sequence, absent thumbs, sandal gap, abnormality of the upper arm	1	Mendeliome	conclusive	7
133	Male	0.509589	Infant (1-23 months)	n/a	Postneonatal	Olivopontocerebellar hypoplasia	2	Movement disorder; Intellectual Disability	no	15
134	Male	0.00821918	Newborn	n/a	Neonatal	Suspect for Marfan/Beals syndrome	1	Mendeliome	conclusive	7
135	Female	0.00821918	Newborn	n/a	Neonatal	Low birth weight, prematurity, thoracic hemivertebrae	1	Mendeliome	no	13
136	Male	0.00821918	Newborn	n/a	Neonatal	Low birth weight, pulmonary valve atresia, ventricular septal defect, overriding aorta	1	Mendeliome	no	12
137	Female	0.0219178	Newborn	n/a	Neonatal	Low birth weight, hypotonia, bilateral clubfeet, frontal bossing, syndactyly, triploidy 69 XXX	1	Mendeliome	no	17
138	Male	2.50959	Child, preschool (2-5 years)	n/a	Postneonatal	Neurodevelopmental delay, ataxia, hypotonia	3	Movement disorder; Epilepsy; Metabolic disorders	no	11
139	Male	2.59178	Child, preschool (2-5 years)	n/a	Postneonatal	Pancytopenia, hepatosplenomegaly	3	Dyskeratosis Congenita; Hemos; Mendeliome	no	9
140	Male	0.372603	Infant (1-23 months)	n/a	Postneonatal	Foot deformities, asymmetry thorax, apneus, small for gestational age, microcephaly	1	Mendeliome	conclusive	17
141	Male	0.060274	Newborn	n/a	Neonatal	Micropenis, cavum septum pellucidum, abnormality of the pons, digital anomalies	1	Intellectual Disability	no	10
142	Unspecified	n/a	Prenatal	unknown	Prenatal	Clinodactyly, hypoplastic right heart, polymicrogyria	2	Ciliopathies; Intellectual Disability	no	15
143	Male	1.43288	Infant (1-23 months)	n/a	Postneonatal	Hypotonia, microcephaly, motor delay, retinal dystrophy	1	Visual impairment	no	19
144	Female	0.643836	Infant (1-23 months)	n/a	Postneonatal	Seizure, intellectual disability	2	Epilepsy; Intellectual Disability	possible	24
145	Female	0.550685	Infant (1-23 months)	n/a	Postneonatal	Central hypoventilation	1	Mendeliome	no	18
146	Male	6.43562	Child (6-12 years)	n/a	Postneonatal	Muscle weakness	1	Muscle disorder	conclusive	6
147	Unspecified	n/a	Prenatal	21w3d	Prenatal	Polydactyly, syndactyly, unilateral renale agenesis, congenital heart defect (VSD, transposition), single umbilical artery, spina bifida occulta	1	Mendeliome	no	8
148	Unspecified	n/a	Prenatal	20w1d	Prenatal	Small long bones, flaring of rib cage	2	Skeletal dysplasia and short stature; Mendeliome	conclusive	20
149	Unspecified	n/a	Prenatal	unknown	Prenatal	Suspect for arthrogryposis multiplex congenita, abnormal carpal morphology	1	Mendeliome	no	12
150	Unspecified	n/a	Prenatal	unknown	Prenatal	Congenital diaphragmatic hernia	2	Mendeliome; Intellectual Disability	no	4
151	Female	0.0136986	Newborn	n/a	Neonatal	Foot polydactyly, neonatal seizure	2	Epilepsy; Intellectual Disability	possible	8
152	Male	0.0109589	Newborn	n/a	Neonatal	46,xy gonadal dysgenesis	1	Disorder of Sex differentiation	possible	12
153	Female	0.0164384	Newborn	n/a	Neonatal	Neonatal seizure	2	Epilepsy; Metabolic disorders	no	13
154	Female	0.0246575	Newborn	n/a	Neonatal	Neonatal seizure, respiratory insufficiency	2	Epilepsy; Metabolic disorders	no	10
155	Male	0.257534	Infant (1-23 months)	n/a	Postneonatal	Distal arthrogryposis, arachnodactyly, bone abnormality, axial hypotonia	1	Mendeliome	possible	10
156	Male	1.20822	Infant (1-23 months)	n/a	Postneonatal	Neurodevelopmental delay, facial dysmorphism, epilepsy, cardiomyopathy	3	Epilepsy; Metabolic disorders; Mendeliome	conclusive	14
157	Female	0.0438356	Newborn	n/a	Neonatal	Pancytopenia	3	Dyskeratosis Congenita; Hemos; Mendeliome	no	11
158	Female	0.386301	Infant (1-23 months)	n/a	Postneonatal	Unknown	1	Movement disorder	no	15
159	Female	0.0164384	Newborn	n/a	Neonatal	Micro/retrognathia, facial dysmorphism, palatoschisis	1	Cranio Facial Anomalies	conclusive	7
160	Female	0.0657534	Newborn	n/a	Neonatal	Unilateral lung agenesis, PAVR, dextrocardia, cor triatriatum, anorectal anomaly	1	Mendeliome	no	15
161	Male	0.0109589	Newborn	n/a	Neonatal	Renotubular dysgenesis	1	Renal disorders	conclusive	12
162	Unspecified	n/a	Prenatal	unknown	Prenatal	Umbilical cord cyst, coarctation of aorta, hemivertebrae, spina bifida	1	Mendeliome	no	7
163	Male	0.0191781	Newborn	n/a	Neonatal	Prematurity, deformity of the skull, facial dysmorphism, ambiguous genitalia, tetralogy of Fallot	1	Mendeliome	conclusive	35
164	Unspecified	n/a	Prenatal	unknown	Prenatal	Microcephaly, abnormal subarachnoid space morphology	1	Mendeliome	conclusive	6
165	Unspecified	n/a	Prenatal	unknown	Prenatal	Short stature, rickets, shortned limbs	1	Skeletal dysplasia and short stature	no	10
166	Unspecified	n/a	Prenatal	13w4d	Prenatal	Omphalocele, ventriculomegaly	4	Ciliopathies; HMSN; Intellectual Disability; Mendeliome	no	11
167	Male	37.6603	Adult (19-65 years)	n/a	Postneonatal	Unknown	1	Mendeliome	no	11
168	Unspecified	n/a	Prenatal	20w3d	Prenatal	Abnormality of skull bone morphology, shortened limbs, short ribs, facial dysmorphism	1	Skeletal dysplasia and short stature	conclusive	6
169	Unspecified	n/a	Prenatal	unknown	Prenatal	Hydrocephalus	1	Mendeliome	no	8
170	Male	0.130137	Infant (1-23 months)	n/a	Postneonatal	Unknown	3	Epilepsy; Metabolic disorders; Mendeliome	conclusive	35
171	Male	0.0136986	Newborn	n/a	Neonatal	Axial hypotonia, feeding difficulties, abnormal thorax morphology	2	HMSN; Muscle disorder	possible	14
172	Male	1.43836	Infant (1-23 months)	n/a	Postneonatal	Seizures	1	Epilepsy	conclusive	20
173	Unspecified	n/a	Prenatal	20w3d	Prenatal	Shortened limbs, abnormal stomach morphology	1	Skeletal dysplasia and short stature	conclusive	8
174	Male	0.134247	Infant (1-23 months)	n/a	Postneonatal	Suspect for Immunodeficiency	1	Severe combined immune difficiency	no	11
175	Unspecified	n/a	Prenatal	unknown	Prenatal	Arthrogryposis multiplex congenita	1	Mendeliome	no	7
176	Female	1.83562	Child, preschool (2-5 years)	n/a	Postneonatal	Paraplegia	1	Movement disorder	no	10
177	Male	0.0246575	Newborn	n/a	Neonatal	Abnormality of the ear, short chin, arthrogryposis	1	Mendeliome	no	8
178	Female	0.0191781	Newborn	n/a	Neonatal	Unknown	1	Oxphos	conclusive	13
179	Female	0.0438356	Newborn	n/a	Neonatal	Polymicrogyria, hydrocephalus, hydronephrosis, abnormality of the right kidney, jejunal atresia, cervical rib right	1	Mendeliome	no	8
180	Unspecified	n/a	Prenatal	21w3d	Prenatal	Abnormality of femur morphology	1	Skeletal dysplasia and short stature	conclusive	8
181	Female	0.0794521	Infant (1-23 months)	n/a	Postneonatal	Proximal renal tubulopathy, abnormality of the musculature of the limbs, cerebellar edema	1	Epilepsy	conclusive	10
182	Unspecified	n/a	Prenatal	unknown	Prenatal	Hydrocephalus, vermis hypoplasia, abnormal cortical gyration	1	Mendeliome	possible	7
183	Female	0.0136986	Newborn	n/a	Neonatal	Neonatal seizures	1	Epilepsy	no	8
184	Female	0.0219178	Newborn	n/a	Neonatal	Congenital heart defect, congenital defect of the pericardium, abnormality of the diaphragm, omphalocele	1	Mendeliome	no	8
185	Male	1.26849	Infant (1-23 months)	n/a	Postneonatal	Neurodevelopmental delay, hypertelorism, downslanted palpebral fissures, thick lips	1	Mendeliome	no	47
186	Male	8.49041	Child (6-12 years)	n/a	Postneonatal	Acute myeloid leukemia, bone marrow failure	1	Bone marrow failure	no	13
187	Female	5.09315	Child, preschool (2-5 years)	n/a	Postneonatal	Schisis, bilateral microtia, congenital heart defect, sacral agenesis, preaxial hand polydactyly, intellectual disability	1	Mendeliome	no	8
188	Female	0.328767	Infant (1-23 months)	n/a	Postneonatal	Epileptic seizure	1	Epilepsy	no	12
189	Female	0.123288	Infant (1-23 months)	n/a	Postneonatal	Unknown	1	Metabolic disorders	conclusive	17
190	Male	3.46301	Child, preschool (2-5 years)	n/a	Postneonatal	Neurodevelopmental delay, epilepsy	2	Epilepsy; Intellectual Disability	no	10
191	Unspecified	n/a	Prenatal	unknown	Prenatal	Hydronephrosis, ventricular septal defect, facial dysmorphism, cardiomegaly, brachycardie, dextrocardia	1	Mendeliome	no	8
192	Female	0.0575342	Newborn	n/a	Neonatal	Neonatal seizures	1	Epilepsy	no	10
193	Male	3.65753	Child, preschool (2-5 years)	n/a	Postneonatal	Renal insufficiency, hypertension, large kidneys	2	Ciliopathies; Renal disorders	no	9
194	Male	0.326027	Infant (1-23 months)	n/a	Postneonatal	Epilepsy	1	Epilepsy	no	18
195	Unspecified	n/a	Prenatal	unknown	Prenatal	Ventriculomegaly, abnormal cerebellum morphology, enlarged cisterna magna	1	Mendeliome	no	9
196	Male	0.0191781	Newborn	n/a	Neonatal	Epilepsy	1	Epilepsy	no	10
197	Unspecified	n/a	Prenatal	unknown	Prenatal	Occipital encephalocele, polycystic kidneys, bilateral polydactyly, oligohydramnios	1	Ciliopathies	conclusive	23
198	Male	0.0191781	Newborn	n/a	Neonatal	Hypotonia, encephalopathy, facial dysmorphism, cryptorchidism, flexion contracture, respiratory insufficiency	2	Fetal Akenesie; Mendeliome	conclusive	17
199	Unspecified	n/a	Prenatal	21w5d	Prenatal	Ascites	1	Mendeliome	no	7
200	Unspecified	n/a	Prenatal	unknown	Prenatal	Ventriculomegaly, small cerebellum, agenesis of corpus callosum	1	Mendeliome	conclusive	9
201	Female	0.00821918	Newborn	n/a	Neonatal	Congenital diaphragmatic hernia, flat midface, prominent glabella, prominent tongue	1	Mendeliome	no	24
202	Unspecified	n/a	Prenatal	unknown	Prenatal	Short tubular bones	1	Skeletal dysplasia and short stature	no	14
203	Female	29.4082	Adult (19-65 years)	n/a	Postneonatal	Hepatosplenomegaly, pancytopenia, suspect for hemophagocytic lymphohistiocytosis or multiple sclerosis, interstitial lung pattern	1	Mendeliome	conclusive	14
204	Unspecified	n/a	Prenatal	12w5d	Prenatal	Hydrops fetalis, thickened nuchal translucency	1	Mendeliome	no	8
205	Male	0.0136986	Newborn	n/a	Neonatal	Seizure	3	Epilepsy; Metabolic disorders; Mendeliome	no	7
206	Male	0.734247	Infant (1-23 months)	n/a	Postneonatal	Epileptic encephalopathy, suspect for West syndrome	2	Epilepsy; Oxphos	no	18
207	Male	0.0684932	Newborn	n/a	Neonatal	Neonatal seizure	2	Epilepsy; Metabolic disorders	conclusive	69
208	Unspecified	n/a	Prenatal	unknown	Prenatal	Short long bones, abnormal bone structure	1	Skeletal dysplasia and short stature	conclusive	12
209	Female	0.761644	Infant (1-23 months)	n/a	Postneonatal	Limb-girdle muscle weakness, respiratory insufficiency	1	Muscle disorder	conclusive	*
210	Unspecified	n/a	Prenatal	unknown	Prenatal	Short long bones, small thorax, suspect for congenital heart defect	1	Skeletal dysplasia and short stature	conclusive	11
211	Male	0.00273973	Newborn	n/a	Neonatal	Retrognathia, microtia	1	Cranio Facial Anomalies	conclusive	10
212	Female	1.32603	Infant (1-23 months)	n/a	Postneonatal	Sarcoma, pancytopenia	1	Bone marrow failure	no	8
213	Unspecified	n/a	Prenatal	unknown	Prenatal	Short fetal femur length, small thorax, ventricular septal defect, single umbilical artery	2	Skeletal dysplasia and short stature; Intellectual Disability	no	10
214	Female	0.0109589	Newborn	n/a	Neonatal	Coarctation of the aorta, ventricular septal defect, bicuspid aortic valve, duodenal atresia	1	Mendeliome	no	68
215	Female	0.0356164	Newborn	n/a	Neonatal	Epilepsy, neonatal asphyxia	1	Epilepsy	no	14
216	Unspecified	n/a	Prenatal	25w1d	Prenatal	Diaphragmatic hernia, pleural effusion, hydrops fetalis	1	Mendeliome	no	9
217	Unspecified	n/a	Prenatal	21w6d	Prenatal	Short long bones, bowing of the femur and tibia, polydactyly of the feet	1	Skeletal dysplasia and short stature	no	10
218	Unspecified	n/a	Prenatal	16w0d	Prenatal	Abnormal nasal bridge morphology, cleft palate, low-set ears, agenesis of right arm and scapula, anorectal anomaly, multiple vertebral and rib anomalies, scoliosis, hypoplastic right lung, tetralogy of Fallot	1	Mendeliome	no	25
219	Unspecified	n/a	Prenatal	unknown	Prenatal	Bowing of femor, small feet, clubfoo, abnormality of the calf musculature	1	Skeletal dysplasia and short stature	no	14
220	Male	0.0219178	Newborn	n/a	Neonatal	Hypotonia	1	Mendeliome	no	11
221	Unspecified	n/a	Prenatal	20w4d	Prenatal	Skeletal dysplasia, short and bowed femur, oligodactyly of both hands	1	Skeletal dysplasia and short stature	no	8
222	Male	9.88767	Child (6-12 years)	n/a	Postneonatal	Vascular malformation of the foot, congenital diaphragmatic hernia, facial dysmorphism	1	Mendeliome	no	23
223	Unspecified	n/a	Prenatal	20w5d	Prenatal	Rhizomelic arm and leg shortening, duplicated collecting system left kidney, abnormal posterior cranial fossa morphology	3	Skeletal dysplasia and short stature; Metabolic disorders; Mendeliome	no	10
224	Female	25.2986	Adult (19-65 years)	n/a	Postneonatal	Short stature	1	Skeletal dysplasia and short stature	no	17
225	Female	0.00547945	Newborn	n/a	Neonatal	Small for gestational age, facial dysmorphism, renal agenesis, single umbilical artery, sacral dimple	2	Cranio Facial Anomalies; Mendeliome	conclusive	11
226	Unspecified	n/a	Prenatal	unknown	Prenatal	Ambiguous genitalia	1	Disorder of Sex differentiation	no	12
227	Male	0.030137	Newborn	n/a	Neonatal	Hypotonia, cryptorchidism, facial dysmorphism	4	Movement disorder; Metabolic disorders; Oxphos; Muscle disorder	conclusive	11
228	Female	0.109589	Infant (1-23 months)	n/a	Postneonatal	Mandibulofacial dysostosis, esophageal atresia, ambiguous genitalia, ventricular septal defect, retrognathia, tracheomalacia, ectopic thyroid, Bilateral external auditory canal atresia	1	Mendeliome	no	8
229	Female	1.46301	Infant (1-23 months)	n/a	Postneonatal	Progressive muscle weakness, tube feeding, distal muscle weakness	2	HMSN; Muscle disorder	conclusive	70
230	Female	0.0109589	Newborn	n/a	Neonatal	Small for gestational age, facial dysmorphism, trigonocephaly, tethered cord, craniosynostosis	2	Mendeliome; Intellectual Disability	conclusive	10
231	Unspecified	n/a	Prenatal	unknown	Prenatal	Agenesis of the vermis, abnormality of hand and foot, narrow thorax, micropenis, small for gestational age	1	Mendeliome	conclusive	12
232	Unspecified	n/a	Prenatal	unknown	Prenatal	Cystic colli, facial dysmorphism, absent nasal bone	1	Mendeliome	no	9
233	Unspecified	n/a	Prenatal	unknown	Prenatal	Nuchal translucency thickened, hydrops fetalis, postaxial polydactyly of hand	1	Mendeliome	no	11
234	Unspecified	n/a	Prenatal	20w3d	Prenatal	Intrauterine growth retardation, arterial thrombosis (umbilical artery)	1	Hemos	no	14
235	Male	1.50411	Child, preschool (2-5 years)	n/a	Postneonatal	Short stature, rickets, multiple fractures	2	Skeletal dysplasia and short stature; Mendeliome	conclusive	9
236	Female	0.030137	Newborn	n/a	Neonatal	Neonatal seizures, epilepsy	1	Epilepsy	conclusive	10
237	Unspecified	n/a	Prenatal	33w5d	Prenatal	Congenital diaphragmatic hernia, ventricular septal defect	1	Mendeliome	conclusive	11
238	Male	2.27945	Child, preschool (2-5 years)	n/a	Postneonatal	Focal epilepsy, developmental delay, short stature, premature birth	3	Epilepsy; Skeletal dysplasia and short stature; Intellectual Disability	no	9
239	Unspecified	n/a	Prenatal	20w3d	Prenatal	Thoracic kyphosis, hydronephrosis of both kidneys, ventricular septal defect, posteriorly rotated ears with prominent helix, narrowing of aorta, single umbilical artery, retrognathia	1	Mendeliome	no	8
240	Male	32.2822	Adult (19-65 years)	n/a	Postneonatal	Aplastic anemia, suspicion of dyskeratosis congenita	1	Bone marrow failure	conclusive	11
241	Female	2.64658	Child, preschool (2-5 years)	n/a	Postneonatal	Immunodeficiency	1	Immune disorders	no	11
242	Female	0.161644	Infant (1-23 months)	n/a	Postneonatal	Hypotonia, hypoventilation, polyhydramnios	3	Intellectual Disability; Oxphos; Muscle disorder	no	8
243	Unspecified	n/a	Prenatal	21w4d	Prenatal	Polyhydramnios, right axis deviation	1	Mendeliome	no	8
244	Male	0.0356164	Newborn	n/a	Neonatal	Cleft palate, tirismus, facial dysmorphism	1	Mendeliome	conclusive	7
245	Female	0.0356164	Newborn	n/a	Neonatal	Low birth weight, ptosis, puffy eyes, abnormal ear morphology, deviation of fingers, excessive hair growth, cleft lip and palate, mild upper jaw cleft, hypotonia, suspicion of Dandy-Walker malformation	1	Mendeliome	possible	7
246	Female	17.9041	Adolescence (13-18 years)	n/a	Postneonatal	Renal insufficiency	1	Renal disorders	no	24
247	Male	0.0219178	Newborn	n/a	Neonatal	Tetralogy of Fallot, coarse facial features, broad nasal bridge, wide mouth	1	Mendeliome	conclusive	8
248	Unspecified	n/a	Prenatal	unknown	Prenatal	Hypotelorism, short long bones	1	Skeletal dysplasia and short stature	no	11
249	Male	12.937	Adolescence (13-18 years)	n/a	Postneonatal	Dysphagia, abnormality of speech, suspicion of congenital myasthenia	1	Muscle disorder	no	19
250	Male	0.30411	Infant (1-23 months)	n/a	Postneonatal	Large for gestational age, microcephaly, apnea, facial dysmorphism, sacral dimple, feeding difficulties	4	Movement disorder; Metabolic disorders; Intellectual Disability; Mendeliome	conclusive	11
251	Female	0.0246575	Newborn	n/a	Neonatal	Neonatal seizure	1	Epilepsy	possible	8
252	Unspecified	n/a	Prenatal	22w5d	Prenatal	Club foot right, rocker bottom foot left, broad neck	2	Intellectual Disability; Mendeliome	no	6
253	Female	0.178082	Infant (1-23 months)	n/a	Postneonatal	Respiratory insufficiency, lymphopenia, immunodeficiency	1	Immune disorders	no	6
254	Unspecified	n/a	Prenatal	20w4d	Prenatal	Macrocephaly, abnormality of skull bone morphology	2	Intellectual Disability; Mendeliome	conclusive	8
255	Unspecified	n/a	Prenatal	20w6d	Prenatal	Long bones, skeletal dysplasia	1	Skeletal dysplasia and short stature	no	6
256	Female	0.0191781	Newborn	n/a	Neonatal	Immunodeficiency, kidney failure, neonatal seizures, anemia	4	Hemos; Metabolic disorders; Renal disorders	possible	38
257	Female	9.55342	Child (6-12 years)	n/a	Postneonatal	Epilepsy	1	Epilepsy	no	8
258	Unspecified	n/a	Prenatal	21w5d	Prenatal	Shortened long bones, frontal bossing, bowing of femora, tibia, and ulna, abnormal thorax morphology	1	Skeletal dysplasia and short stature	conclusive	14
259	Male	0.0191781	Newborn	n/a	Neonatal	Microcephaly, congenital heart defect	2	Intellectual Disability; Mendeliome	conclusive	11
260	Female	1.43562	Infant (1-23 months)	n/a	Postneonatal	Epicanthus, epilepsy	1	Epilepsy	conclusive	18
261	Male	2.14795	Child, preschool (2-5 years)	n/a	Postneonatal	Bone marrow hypocellularity	1	Bone marrow failure	no	11
262	Unspecified	n/a	Prenatal	unknown	Prenatal	Shortened limbs, abnormality of the right hand	1	Skeletal dysplasia and short stature	conclusive	18
263	Unspecified	n/a	Prenatal	unknown	Prenatal	Bilateral choroid plexus cysts, omphalocele, umbilical cord cyst, increased nuchal translucency, cisterna magna	1	Mendeliome	no	13
264	Unspecified	n/a	Prenatal	unknown	Prenatal	Blake's pouch cyst, cerebellar vermis hypoplasia	2	Intellectual Disability; Mendeliome	conclusive	8
265	Unspecified	n/a	Prenatal	unknown	Prenatal	Heart defect, mesocardia, atrioventricular septal defect, total anomalous pulmonary venous return, abnormal umbilical cord blood vessel morphology	1	Mendeliome	no	9
266	Male	0.457534	Infant (1-23 months)	n/a	Postneonatal	West syndrome, epilepsy, hypotonia, drowsiness, short corpus callosum, flat occiput	1	Epilepsy	conclusive	11
267	Unspecified	n/a	Prenatal	20w6d	Prenatal	Congenital heart defect, abnormality of the kidneys	2	Ciliopathies; Renal disorders	no	10
268	Male	0.0246575	Newborn	n/a	Neonatal	Suspicion of Prader-Willi syndrome, hypotonia, bradypnea	1	Muscle disorder	conclusive	7
269	Unspecified	n/a	Prenatal	unknown	Prenatal	Agenesis of corpus callosum	1	Mendeliome	no	8
270	Unspecified	n/a	Prenatal	16w1d	Prenatal	Thick neck, congenital heart defect, transposition of the great arteries	1	Mendeliome	no	15
271	Unspecified	n/a	Prenatal	unknown	Prenatal	Brachycephaly, facial dysmorphism, abnormality of skull bone morphology	2	Intellectual Disability; Mendeliome	no	7
272	Unspecified	n/a	Prenatal	20w0d	Prenatal	Extra structure on the left hand, hypospadias, brain plexus cysts,partial agenesis of corpus callosum, fetal bilateral pyelectasis	1	Mendeliome	no	19
273	Male	5.13699	Child, preschool (2-5 years)	n/a	Postneonatal	Unknown	1	Intellectual Disability	no	20
274	Unspecified	n/a	Prenatal	unknown	Prenatal	Microcephaly, Small cerebellum, Oligohydramnios, Suspicion of Walker-Warburg syndrome	2	Intellectual Disability; Muscle disorder	no	14
275	Male	0.0164384	Newborn	n/a	Neonatal	Elbow contractures, knee contractures, facial asymmetry, rocker bottom feet	1	Skeletal dysplasia and short stature	conclusive	13
276	Male	0.156164	Infant (1-23 months)	n/a	Postneonatal	Suspect for hemophagocytic lymphohistiocytosis	1	Immune disorders	conclusive	13
277	Male	27.3068	Adult (19-65 years)	n/a	Postneonatal	Unknown	1	Visual impairment	no	13
278	Unspecified	n/a	Prenatal	20w6d	Prenatal	Hypoplastic left heart, abnormal conus terminalis morphology, abnormal vertebral morphology	1	Mendeliome	no	14
279	Female	10.063	Child (6-12 years)	n/a	Postneonatal	Severe intellectual disability, low weigth, short stature, motor delay, delayed speech and language development, epilepsy, abnormal cerebral white matter morphology, cerebral atrophy	3	Epilepsy; Metabolic disorders; Intellectual Disability	possible	10
280	Unspecified	n/a	Prenatal	unknown	Prenatal	Short long bone, single umbilical artery	3	Skeletal dysplasia and short stature; Intellectual Disability; Mendeliome	no	8
281	Male	0.545205	Infant (1-23 months)	n/a	Postneonatal	Epilepsy, focale cortical dysplasia	2	Epilepsy; Intellectual Disability	no	9
282	Male	0.676712	Infant (1-23 months)	n/a	Postneonatal	West syndrome	3	Epilepsy; Metabolic disorders; Intellectual Disability	no	9
283	Male	22.0329	Adult (19-65 years)	n/a	Postneonatal	Severe intellectual disability, autism	1	Intellectual Disability	no	7
284	Female	20.8329	Adult (19-65 years)	n/a	Postneonatal	Arthritis, exercise intolerance, limb-girdle muscle weakness	1	Mendeliome	no	9
285	Unspecified	n/a	Prenatal	20w3d	Prenatal	Multiple renal cysts, enlarged cerebellum, Tetralogy of Fallot	5	Cranio Facial Anomalies; Ciliopathies; HMSN; Renal disorders; Mendeliome	conclusive	14
286	Unspecified	n/a	Prenatal	11w4d	Prenatal	Abdominal situs inversus, congenital heart defect, thickened nuchal skin fold	2	Ciliopathies; Mendeliome	no	15
287	Female	0.00821918	Newborn	n/a	Neonatal	Congenital diaphragmatic hernia, ventricular septal defect, anteriorly placed anus	1	Mendeliome	no	11
288	Male	0.0520548	Newborn	n/a	Neonatal	Congenital diaphragmatic hernia	1	Mendeliome	no	8
289	Male	0.115068	Infant (1-23 months)	n/a	Postneonatal	Non-ketotic hyperglycinemia, epileptic encephalopathy	2	Epilepsy; Intellectual Disability	conclusive	10
290	Unspecified	n/a	Prenatal	unknown	Prenatal	Bilateral cleft	1	Cranio Facial Anomalies	no	10
291	Female	0.00547945	Newborn	n/a	Neonatal	Low birth weight, small head circumference, short length, external ear malformation, persistent left superior vena cava, ventricular septal defects, oligohydramnios, facial dysmorphism, cerebral cystic malformation	1	Intellectual Disability	no	8
292	Male	0.0493151	Newborn	n/a	Neonatal	Tonic-clonic seizures	1	Epilepsy	conclusive	8
293	Unspecified	n/a	Prenatal	12w4d	Prenatal	Abnormality of the leg, megabladder, sacral/anal abnormality	1	Mendeliome	no	11
294	Unspecified	n/a	Prenatal	unknown	Prenatal	Abnormality of the kidney and liver, hypoplastic aortic arch	2	Intellectual Disability; Mendeliome	no	7
295	Female	1.59452	Child, preschool (2-5 years)	n/a	Postneonatal	Congenital lobar emphysema, developmental delay, feeding difficulties, microcephaly, poor vision, facial dysmorphism, tented upper lip vermilion, prominent forehead	1	Intellectual Disability	conclusive	6
296	Female	0.0794521	Infant (1-23 months)	n/a	Postneonatal	Hypertrophic cardiomyopathy	1	Mendeliome	no	6
297	Male	10.0959	Child (6-12 years)	n/a	Postneonatal	Necrotizing encephalopath	1	Immune disorders	no	3
298	Male	8.28493	Child (6-12 years)	n/a	Postneonatal	Aplastic anemia	1	Bone marrow failure	no	8
299	Female	53.4575	Adult (19-65 years)	n/a	Postneonatal	Pancytopenie, breast carcinoma	1	Bone marrow failure	no	11
300	Male	0.00547945	Newborn	n/a	Neonatal	Low birth weight, abnormally shaped ears, ventricular septal defect, bilateral preauricular pits, intrauterine growth restriction, oligohydramnios, facial dysmorphism	1	Mendeliome	no	7
301	Unspecified	n/a	Prenatal	20w1d	Prenatal	Increased nuchal translucency, atrioventricular septal defect	1	Mendeliome	conclusive	7
302	Male	0.273973	Infant (1-23 months)	n/a	Postneonatal	Corneal dystrophy	1	Visual impairment	possible	12
303	Unspecified	n/a	Prenatal	unknown	Prenatal	Intrauterine growth retardation, microcephaly, facial dysmorphism	2	Intellectual Disability; Mendeliome	no	10
304	Unspecified	n/a	Prenatal	33w2d	Prenatal	Hypoplastic left heart, abnormal mitral valve	1	Mendeliome	no	13
305	Male	0.123288	Infant (1-23 months)	n/a	Postneonatal	Cholestasis, Hypoglycemia, abnormality of the nail, abnormal subcutaneous fat tissue distribution	2	Metabolic disorders; Mendeliome	possible	30
306	Unspecified	n/a	Prenatal	unknown	Prenatal	Macrocephaly	1	Mendeliome	conclusive	7
307	Unspecified	n/a	Prenatal	unknown	Prenatal	Lissencephaly, agenesis of corpus callosum, microcephaly, abnormal cortical gyration	1	Mendeliome	no	66
308	Unspecified	n/a	Prenatal	unknown	Prenatal	Congenital diaphragmatic hernia	1	Mendeliome	no	10
309	Unspecified	n/a	Prenatal	unknown	Prenatal	Abnormal renal echogenicity and cerebellum	1	Mendeliome	conclusive	26
310	Male	37.9836	Adult (19-65 years)	n/a	Postneonatal	Cystic kidneys, hyperparathyroidism, facial dysmorphism, delayed speech and language development	1	Mendeliome	no	13
311	Unspecified	n/a	Prenatal	unknown	Prenatal	Short fetal femur length	1	Skeletal dysplasia and short stature	no	12
312	Female	0.547945	Infant (1-23 months)	n/a	Postneonatal	West syndrome	1	Epilepsy	conclusive	9
313	Female	0.0438356	Newborn	n/a	Neonatal	Severe combined immunodeficiency	2	Severe combined immune difficiency	no	10
314	Unspecified	n/a	Prenatal	unknown	Prenatal	Absent ductus venosus, abnormal brain morphology	1	Mendeliome	no	14
315	Female	2.45479	Child, preschool (2-5 years)	n/a	Postneonatal	Absent speech, motor delay	1	Intellectual Disability	no	12
316	Unspecified	n/a	Prenatal	unknown	Prenatal	Abnormality of brain morphology, encephalocele	1	Mendeliome	no	13
317	Female	0.0383562	Newborn	n/a	Neonatal	Severe combined immunodeficiency	2	Immune disorders; Severe combined immune difficiency	no	12
318	Female	0.70137	Infant (1-23 months)	n/a	Postneonatal	Motor developmental delay, oculomotor apraxia, facial dysmorphism, bifid uvula	3	Visual impairment; Metabolic disorders; Intellectual Disability	conclusive	12
319	Male	0.328767	Infant (1-23 months)	n/a	Postneonatal	Feeding difficulties, failure to thrive, diarrhea, vomiting, abdominal distention, abnormality spleen and kidneys, dolichosigmoid	1	Mendeliome	no	8
320	Male	0.942466	Infant (1-23 months)	n/a	Postneonatal	Dystonia, motor developmental delay, constipation	1	Movement disorder	no	12
321	Unspecified	n/a	Prenatal	unknown	Prenatal	Intrauterine growth restriction, cleft lip and palate, cardiomegaly, facial dysmorphism, retrognathia	1	Mendeliome	no	9
322	Unspecified	n/a	Prenatal	unknown	Prenatal	Occipital meningocele	3	Ciliopathies; Intellectual Disability; Mendeliome	no	11
323	Male	1.5863	Child, preschool (2-5 years)	n/a	Postneonatal	Unknown	1	Oxphos	conclusive	14
324	Unspecified	n/a	Prenatal	21w2d	Prenatal	Abnormal hepatic echogenicity, abnormal heart morphology, suspected tuberous sclerosis	1	Intellectual Disability	no	8
325	Unspecified	n/a	Prenatal	unknown	Prenatal	Complex heart defect, caudal appendage, abnormality of the skull	1	Mendeliome	conclusive	9
326	Unspecified	n/a	Prenatal	unknown	Prenatal	Fetal cystic hygroma, hydrops fetalis, congenital heart defect	1	Mendeliome	no	9
327	Male	0.0109589	Newborn	n/a	Neonatal	Hypertrophic cardiomyopathy, pulmonary valve atresia, restrictive ventricular septal defect, aortopulmonary collateral arteries	2	Cardiac disorder; Mendeliome	no	20
328	Unspecified	n/a	Prenatal	18w6d	Prenatal	Fetal hydrothorax, ascites, esophageal atresia	1	Mendeliome	conclusive	11
329	Female	17.3014	Adolescence (13-18 years)	n/a	Postneonatal	Unknown	4	Movement disorder; Immune disorders; Metabolic disorders; Intellectual Disability	no	14
330	Unspecified	n/a	Prenatal	26w6d	Prenatal	Omphalocele, thickened nuchal skin fold, underdeveloped left forearm, abnormal spine morphology	1	Mendeliome	no	29.3676
331	Unspecified	n/a	Prenatal	20w2d	Prenatal	Intrauterine growth restriction, hypertelorism, abnormal stomach morphology, complex ventricular septal defect, truncus arteriosus	1	Mendeliome	conclusive	7
332	Female	12.3342	Child (6-12 years)	n/a	Postneonatal	Refractory status epilepticus	3	Epilepsy; Metabolic disorders; Oxphos	no	13
333	Unspecified	n/a	Prenatal	22w1d	Prenatal	Macrocephaly, short ribs, short fetal femur length, absent nasal bridge	4	Skeletal dysplasia and short stature; Metabolic disorders; Intellectual Disability; Mendeliome	conclusive	7
334	Male	4.63562	Child, preschool (2-5 years)	n/a	Postneonatal	Epileptic seizure, status epilepticus, encephalopathy	3	Epilepsy; Metabolic disorders; Oxphos	no	12
335	Unspecified	n/a	Prenatal	21w1d	Prenatal	Congenital heart defect, hypoplastic left heart, pulmonary valve stenosis, hydrops fetalis, thickened nuchal skin fold, single umbilical artery	1	Mendeliome	no	17.4113
336	Female	0.00821918	Newborn	n/a	Neonatal	Neonatal seizure	1	Epilepsy	conclusive	10
337	Unspecified	n/a	Prenatal	27w0d	Prenatal	Fetal hydrothorax	2	Intellectual Disability; Mendeliome	no	7
338	Unspecified	n/a	Prenatal	31w3d	Prenatal	Abnormality of the skeletal system, suspect for rhizomelic chondrodysplasia punctata or X-linked Conradi-Hünermann syndrome	1	Skeletal dysplasia and short stature	conclusive	12
339	Male	6.79084	Child (6-12 years)	n/a	Postneonatal	Nephrotic syndrome, hypertension, hypothyreody, immunodeficiency	2	Immune disorders; Renal disorders	no	16.3446
340	Unspecified	n/a	Prenatal	20w2d	Prenatal	Intrauterine growth retardation, ambiguous genitalia	3	Disorder of Sex differentiation; Skeletal dysplasia and short stature; Mendeliome	no	10
341	Male	1.4137	Infant (1-23 months)	n/a	Postneonatal	Unknown	1	Epilepsy	no	11
342	Unspecified	n/a	Prenatal	unknown	Prenatal	Short femur, intrauterine growth retardation	2	Skeletal dysplasia and short stature; Mendeliome	no	27
343	Unspecified	n/a	Prenatal	unknown	Prenatal	Agenesis of corpus callosum, facial dysmorphism, macrocephaly	1	Mendeliome	no	10
344	Unspecified	n/a	Prenatal	unknown	Prenatal	Cleft palate, medullary cystic kidney disease	1	Mendeliome	no	10
345	Male	0.147945	Infant (1-23 months)	n/a	Postneonatal	Scrotal hypospadias, micropenis, small for gestational age, hemangioma, facial dysmorphism	2	Disorder of Sex differentiation; Metabolic disorders	no	13
346	Unspecified	n/a	Prenatal	20w1d	Prenatal	Intrauterine growth retardation, small cerebellum, cardiomegaly, ascites, oligohydramnios	2	Intellectual Disability; Mendeliome	no	11
347	Male	0.191781	Infant (1-23 months)	n/a	Postneonatal	West syndrome	1	Epilepsy	no	*
348	Female	0.0109589	Newborn	n/a	Neonatal	Hydrops fetalis, fetal hydrothorax	1	Mendeliome	no	7
349	Female	0.313478	Infant (1-23 months)	n/a	Postneonatal	Developmental delay, epilepsy,myoclonus	4	Visual impairment; Epilepsy; Metabolic disorders; Intellectual Disability	no	8.5805
350	Unspecified	n/a	Prenatal	unknown	Prenatal	Congenital diaphragmatic hernia	1	Mendeliome	no	14
351	Unspecified	n/a	Prenatal	unknown	Prenatal	Tetralogy of Fallot	3	Epilepsy; Intellectual Disability; Mendeliome	no	6
352	Unspecified	n/a	Prenatal	20w2d	Prenatal	Shortened long bones, bowed femora, ventricular septal defect, flat face	1	Skeletal dysplasia and short stature	conclusive	10
353	Male	38.1863	Adult (19-65 years)	n/a	Postneonatal	Hypercalcemia, hyperplastic parathyroid glands, suspected severe hyperparathyroidism	1	Renal disorders	conclusive	18
354	Male	0.632877	Infant (1-23 months)	n/a	Postneonatal	Developmental delay, opisthotonus	3	Movement disorder; Metabolic disorders; Intellectual Disability	no	13
355	Female	0.572603	Infant (1-23 months)	n/a	Postneonatal	Respiratory distress, skeletal dysplasia, facial dysmorphism	1	Skeletal dysplasia and short stature	possible	15
356	Unspecified	n/a	Prenatal	32w3d	Prenatal	Short tubular bones, cardiomegaly	2	Skeletal dysplasia and short stature; Mendeliome	no	19
357	Unspecified	n/a	Prenatal	20w6d	Prenatal	Thickened nuchal skin fold, ascites, abnormal pulmonary valve morphology	2	Mendeliome; Rasopathies	conclusive	10
358	Male	0.0465753	Newborn	n/a	Neonatal	Small for gestational age, cryptorchidism, hypospadias	3	Disorder of Sex differentiation; Hypergonadotrophic Hypergonadism; Mendeliome	no	7
359	Male	0.476712	Infant (1-23 months)	n/a	Postneonatal	Developmental regression, epilepsy	2	Epilepsy; Intellectual Disability	no	13
360	Female	1.47397	Infant (1-23 months)	n/a	Postneonatal	Unknown	2	Metabolic disorders; Mendeliome	no	14
361	Unspecified	n/a	Prenatal	unknown	Prenatal	Small femoral heads, Small humeral epiphyses	1	Skeletal dysplasia and short stature	conclusive	20
362	Male	0.8	Infant (1-23 months)	n/a	Postneonatal	Septo-optic dysplasia, developmental cataract, dilated cardiomyopathy	4	Cardiac disorder; Metabolic disorders; Mendeliome; Oxphos	conclusive	11
363	Female	0.030137	Newborn	n/a	Neonatal	Short stature, abnormality of the skeletal system	2	Skeletal dysplasia and short stature; Metabolic disorders	conclusive	11
364	Unspecified	n/a	Prenatal	20w3d	Prenatal	Bowing of femur, abnormal shape of long bones	2	Skeletal dysplasia and short stature; Intellectual Disability	conclusive	17
365	Unspecified	n/a	Prenatal	21w1d	Prenatal	Widened cavum septum pellucidum	3	Epilepsy; Intellectual Disability; Mendeliome	no	13
366	Female	0.00960249	Newborn	n/a	Neonatal	Small for gestational age, congenital heart abnormality, respiratory insufficiency	3	Metabolic disorders; Mendeliome; Oxphos	possible	6.49509
367	Unspecified	n/a	Prenatal	20w0d	Prenatal	Short long bones, short ribs, abnormal thorax morphology	1	Skeletal dysplasia and short stature	conclusive	13
368	Unspecified	n/a	Prenatal	unknown	Prenatal	Intrauterine growth restriction, hypoplasia of cerebellum	1	Mendeliome	no	13
369	Unspecified	n/a	Prenatal	unknown	Prenatal	Bone overgrowth, abnormal digit morphology	1	Mendeliome	no	17
370	Female	0.0478971	Newborn	n/a	Neonatal	Hypotonia, feeding difficulties, vesicoureteral reflux, hydronephrosis	3	Ciliopathies; Renal disorders; Mendeliome	no	14.5176
371	Unspecified	n/a	Prenatal	unknown	Prenatal	Short long bones, increased head circumference, cleft palate, micrognathia	1	Mendeliome	conclusive	17
372	Female	0.509589	Infant (1-23 months)	n/a	Postneonatal	Unknown	1	Epilepsy	no	12
373	Unspecified	n/a	Prenatal	unknown	Prenatal	Transposition of the great arteries, ventricular septal defect	1	Mendeliome	no	12
374	Male	12.4822	Child (6-12 years)	n/a	Postneonatal	Ptosis, exercise intolerance, suspected congenital myasthenic syndrome	2	Oxphos; Muscle disorder	no	12
375	Female	0.0164384	Newborn	n/a	Neonatal	Cardiomyopathy, chylothorax	2	Mendeliome; Rasopathies	conclusive	15
376	Male	1.42466	Infant (1-23 months)	n/a	Postneonatal	Epilepsy	1	Epilepsy	no	12
377	Unspecified	n/a	Prenatal	unknown	Prenatal	Unknown	1	Mendeliome	no	28
378	Female	7.7726	Child (6-12 years)	n/a	Postneonatal	dystonia	1	Movement disorder	no	18
379	Male	0.40274	Infant (1-23 months)	n/a	Postneonatal	Prematurity, intrauterine growth restriction, congenital glaucoma, multiple lung cysts, pulmonary hypertension, growth delay, feeding difficulties, inguinal hernia	2	Visual impairment; Intellectual Disability	no	12
380	Unspecified	n/a	Prenatal	unknown	Prenatal	Interrupted aortic arch, ventricular septal defect	1	Mendeliome	no	11
381	Male	1.88353	Child, preschool (2-5 years)	n/a	Postneonatal	Growth delay, skeletal dysplasia, failure to thrive, bleeding	1	Skeletal dysplasia and short stature	no	10.5123
382	Unspecified	n/a	Prenatal	21w3d	Prenatal	Short long bones	1	Skeletal dysplasia and short stature	no	13
383	Unspecified	n/a	Prenatal	unknown	Prenatal	Skeletal dysplasia	2	Skeletal dysplasia and short stature; Mendeliome	conclusive	11
384	Female	0.112329	Infant (1-23 months)	n/a	Postneonatal	Unknown	1	Mendeliome	no	21
385	Male	1.32603	Infant (1-23 months)	n/a	Postneonatal	Visual impairment, hypotonia, motor retardation	2	Visual impairment; Intellectual Disability	no	19
386	Male	3.81918	Child, preschool (2-5 years)	n/a	Postneonatal	Aortic valve stenosis, muscular dystrophy	1	Muscle disorder	conclusive	18
387	Male	0.0219178	Newborn	n/a	Neonatal	Axial hypetonia	2	Mendeliome; Muscle disorder	no	14
388	Female	0.328767	Infant (1-23 months)	n/a	Postneonatal	Epilepsy, hypotonia, Feeding difficulties, cerebral atrophy	2	Epilepsy; Metabolic disorders	possible	21
389	Male	32.5479	Adult (19-65 years)	n/a	Postneonatal	Rhabdomyosarcoma	1	Hereditary cancer	no	7
390	Unspecified	n/a	Prenatal	unknown	Prenatal	Hydrocephalus, ventriculomegaly	1	Mendeliome	no	11
391	Male	0.0450963	Newborn	n/a	Neonatal	Birth weight below the 3rd percentile, facial dysmorphism, hypertelorism, microphthalmia, broad nasal bridge, asymmetric nares	1	Cranio Facial Anomalies	no	6.53985
392	Male	0.0794521	Infant (1-23 months)	n/a	Postneonatal	Unconjugated hyperbilirubinemia, suspected Crigler-Najjar syndrome type 2	2	Ciliopathies; Metabolic disorders	no	14
393	Male	1.05664	Infant (1-23 months)	n/a	Postneonatal	Facial muscle weakness, ptosis	1	Muscle disorder	no	10.3265
394	Male	0.805479	Infant (1-23 months)	n/a	Postneonatal	Dystonia	1	Movement disorder	no	21
395	Male	4.17372	Child, preschool (2-5 years)	n/a	Postneonatal	Epilepsy, developmental speech delay, headache	1	Epilepsy	no	13.5911
396	Male	0.0246575	Newborn	n/a	Neonatal	Intrauterine growth retardation, membranous choanal atresia, premature birth	1	Mendeliome	no	11
397	Female	0.290411	Infant (1-23 months)	n/a	Postneonatal	Microcytic anemia, ventricular septal defect, poor growth	1	Bone marrow failure	no	11
398	Unspecified	n/a	Prenatal	unknown	Prenatal	Complex heart defect, double outlet right ventricle, tetralogy of Fallot, thickened nuchal fold, single umbilical artery	1	Intellectual Disability	conclusive	45
399	Unspecified	n/a	Prenatal	unknown	Prenatal	Small humerus, bilateral club feet, short long bones	1	Skeletal dysplasia and short stature	conclusive	10
400	Male	0.0109589	Newborn	n/a	Neonatal	Unknown	1	Cardiac disorder	no	12
401	Unspecified	n/a	Prenatal	unknown	Prenatal	Scoliosis, persistent right umbilical vein	1	Mendeliome	no	9
402	Unspecified	n/a	Prenatal	19w4d	Prenatal	Aortic valve stenosis, ascending aorta hypoplasia	1	Mendeliome	no	12
403	Unspecified	n/a	Prenatal	20w0d	Prenatal	Thickened nuchal skin fold, transposition of the great arteries, aplasia/hypoplasia involving the nose	2	Mendeliome; Rasopathies	conclusive	16
404	Unspecified	n/a	Prenatal	unknown	Prenatal	Congenital heart defect, double outlet right ventricle, transposition of the great arteries, hypoplastic aortic arch	1	Mendeliome	no	9
405	Unspecified	n/a	Prenatal	unknown	Prenatal	Criss-cross atrioventricular valves with superior-inferior ventricles, duplicated collecting system	1	Mendeliome	no	12
406	Unspecified	n/a	Prenatal	22w2d	Prenatal	Micropenis	2	Disorder of Sex differentiation; Mendeliome	no	11
407	Unspecified	n/a	Prenatal	unknown	Prenatal	Dilated cardiomyopathy, lung hypoplasia	4	Cardiac disorder; Metabolic disorders; Mendeliome; Oxphos	no	22.4919
408	Female	4.4411	Child, preschool (2-5 years)	n/a	Postneonatal	Anorectal anomaly, laryngomalacia, toe syndactyly, iris coloboma, neurodevelopmental abnormality , hemiballismus, ataxia, dystonia, tics	1	Movement disorder	no	12
409	Unspecified	n/a	Prenatal	22w1d	Prenatal	Curvature of bones	1	Fetal Akenesie	no	14
410	Male	0.0164384	Newborn	n/a	Neonatal	Distal arthrogryposis, talipes equinovarus, proptosis, seizure	2	Skeletal dysplasia and short stature; Mendeliome	conclusive	13
411	Unspecified	n/a	Prenatal	unknown	Prenatal	Congenital anomalies of kidney and urinary tract, urethral valve	1	Mendeliome	no	11
412	Unspecified	n/a	Prenatal	unknown	Prenatal	Sinus bradycardia, decreased fetal movement	3	Fetal Akenesie; Movement disorder; Mendeliome	conclusive	11
413	Unspecified	n/a	Prenatal	unknown	Prenatal	Fetal cystic hygroma, ventricular septal defect	2	Mendeliome; Rasopathies	no	10
414	Male	0.0367858	Newborn	n/a	Neonatal	Large fontanelles, facial dysmorphism, inspiratory stridor, cryptorchidism, short neck, mega cisterna magna, feeding difficulties	1	Mendeliome	conclusive	11.5732
415	Unspecified	n/a	Prenatal	20w2d	Prenatal	Skeletal dysplasia	2	Skeletal dysplasia and short stature; Mendeliome	no	10.3254
416	Unspecified	n/a	Prenatal	unknown	Prenatal	Thickened nuchal skin fold, noonan syndrome, ureteropelvic junction obstruction	1	Mendeliome	no	12
417	Male	4.78356	Child, preschool (2-5 years)	n/a	Postneonatal	Status epilepticus	1	Oxphos	conclusive	14
418	Female	2.33151	Child, preschool (2-5 years)	n/a	Postneonatal	Muscle weakness, leukodystrophy	1	Movement disorder	possible	7
419	Male	0.971736	Infant (1-23 months)	n/a	Postneonatal	Small for gestational age, primary microcephaly	1	Skeletal dysplasia and short stature	conclusive	8.3163
420	Unspecified	n/a	Prenatal	20w5d	Prenatal	Primary microcephaly	1	Intellectual Disability	no	7
421	Unspecified	n/a	Prenatal	unknown	Prenatal	Intrauterine growth retardation, long bone overgrowth, increased head circumference, small genitalia, absent nasal bone	1	Mendeliome	no	8
422	Unspecified	n/a	Prenatal	unknown	Prenatal	Pulmonic stenosis	2	Cardiac disorder; Mendeliome	no	11
423	Unspecified	n/a	Prenatal	19w2d	Prenatal	Short long bones, short ribs, small thorax, ventriculomegalie, ventricular septal defect	2	Skeletal dysplasia and short stature; Intellectual Disability	conclusive	12
424	Unspecified	n/a	Prenatal	unknown	Prenatal	Situs inversus totalis, decreased fetal movement	2	Fetal Akenesie; Mendeliome	no	9
425	Unspecified	n/a	Prenatal	12w0d	Prenatal	Retrognathia, increased nuchal translucency, bulbous feet	1	Mendeliome	conclusive	15
426	Unspecified	n/a	Prenatal	unknown	Prenatal	Right hand absence, short right forearm, echogenic intracardiac focus	1	Mendeliome	no	10
427	Male	42.326	Adult (19-65 years)	n/a	Postneonatal	Aplastic anemia	2	Bone marrow failure; Dyskeratosis Congenita	conclusive	8
428	Female	0.682192	Infant (1-23 months)	n/a	Postneonatal	West syndrome	1	Epilepsy	no	15
429	Male	0.245203	Infant (1-23 months)	n/a	Postneonatal	Hypospadias, congenital partial absence of foreskin, neonatal hyperbilirubinemia, ventricular septal defect, cholestasis, gastroesophageal reflux, sacral dimple, inverted nipples, flat philtrum	1	Mendeliome	conclusive	10.5011
430	Female	46.3808	Adult (19-65 years)	n/a	Postneonatal	Unknown	1	Oxphos	no	10
431	Unspecified	n/a	Prenatal	unknown	Prenatal	Thickened nuchal skin fold, suspect for abnormal aortic morphology	2	Mendeliome; Rasopathies	conclusive	7
432	Unspecified	n/a	Prenatal	20w1d	Prenatal	Rocker bottom foot, horseshoe kidney, persistent left superior vena cava	2	Fetal Akenesie; Mendeliome	conclusive	9
433	Female	0.0342125	Newborn	n/a	Neonatal	Congenital diaphragmatic hernia	1	Mendeliome	no	5.51244
434	Male	0.128767	Infant (1-23 months)	n/a	Postneonatal	Prominent ear helix, preauricular pit, extra rib, hydronephrosis, bladder fistula, bifid scrotum	1	Mendeliome	no	8
435	Unspecified	n/a	Prenatal	16w0d	Prenatal	Increased nuchal translucency, hydrothorax	1	Mendeliome	no	10
436	Unspecified	n/a	Prenatal	22w0d	Prenatal	Shortened limbs, thickened nuchal skin fold	2	Intellectual Disability; Mendeliome	no	7.32345
437	Unspecified	n/a	Prenatal	unknown	Prenatal	Short femur, foot deformity, decreased skull ossification	1	Skeletal dysplasia and short stature	conclusive	8
438	Female	0.30411	Infant (1-23 months)	n/a	Postneonatal	Short stature, short long bones, irregular metaphyses, ovoid vertebral bodies	1	Skeletal dysplasia and short stature	no	18
439	Male	11.7479	Child (6-12 years)	n/a	Postneonatal	Cardiomyopathy, arrhythmia	1	Cardiac disorder	no	11
440	Female	12.8192	Adolescence (13-18 years)	n/a	Postneonatal	Small for gestational age, proportionate short stature, clinodactyly of the 5th finger	1	Skeletal dysplasia and short stature	no	10
441	Unspecified	n/a	Prenatal	unknown	Prenatal	Increased nuchal translucency, cardiomegaly, polyhydramnios	1	Mendeliome	no	7
442	Unspecified	n/a	Prenatal	19w6d	Prenatal	Fetal hydrothorax, hydrops fetalis, ascites	1	Mendeliome	no	8
443	Unspecified	n/a	Prenatal	22w0d	Prenatal	Retrognathia	2	Intellectual Disability; Mendeliome	no	9
444	Female	16.6274	Adolescence (13-18 years)	n/a	Postneonatal	46,xy gonadal dysgenesis	1	Disorder of Sex differentiation	conclusive	7
445	Unspecified	n/a	Prenatal	20w1d	Prenatal	Short long bones, talipes equinovarus, bowed femur, hyperechogenic liver, increased placental thickness	1	Skeletal dysplasia and short stature	no	11
446	Female	10.0971	Child (6-12 years)	n/a	Postneonatal	Unknown	3	Epilepsy; Metabolic disorders; Oxphos	no	10.5419
447	Unspecified	n/a	Prenatal	unknown	Prenatal	Congenital diaphragmatic hernia	1	Mendeliome	no	12.32
448	Male	2.03288	Child, preschool (2-5 years)	n/a	Postneonatal	Global developmental delay	1	Intellectual Disability	conclusive	6
449	Unspecified	n/a	Prenatal	unknown	Prenatal	Hypoplasia of the right cerebellum	1	Mendeliome	no	8
450	Male	0.0109589	Newborn	n/a	Neonatal	Anal atresia, butterfly vertebrae, bicuspid aortic valve, epiphyseal stippling	1	Mendeliome	no	10
451	Male	1.14521	Infant (1-23 months)	n/a	Postneonatal	Unknown	3	Aneurysm; Epilepsy; Mendeliome	no	12
452	Female	2.41918	Child, preschool (2-5 years)	n/a	Postneonatal	Pancytopenia	2	Bone marrow failure; Immune disorders	no	7
453	Unspecified	n/a	Prenatal	19w6d	Prenatal	Thickened nuchal skin fold, microcephaly	2	Mendeliome; Rasopathies	no	7
454	Male	0.0164384	Newborn	n/a	Neonatal	Right atrial isomerism, double outlet right ventricle, atrioventricular septal defect, transposition of the great arteries, right aortic arch, pulmonary atresia, total anomalous pulmonary venous return, abdominal situs inversus, asplenia, duplex left kidney	1	Ciliopathies	conclusive	7
455	Male	0.758904	Infant (1-23 months)	n/a	Postneonatal	Unknown	1	Intellectual Disability	conclusive	22
456	Unspecified	n/a	Prenatal	unknown	Prenatal	Bilateral postaxial polydactyly hand	2	Ciliopathies; Mendeliome	no	12
457	Male	0.414871	Infant (1-23 months)	n/a	Postneonatal	failure to thrive, groot ASD type 2, pulmonale hypertensie eci.	1	Mendeliome	no	15.5721
458	Female	0.0493151	Newborn	n/a	Neonatal	Unknown	1	Epilepsy	possible	7
459	Female	0.173637	Infant (1-23 months)	n/a	Postneonatal	Premature birth, extrapiramidal signs, encephalopathy	2	Movement disorder; Intellectual Disability	conclusive	6.6224
460	Female	32.4493	Adult (19-65 years)	n/a	Postneonatal	Ovarian neoplasm	1	Hereditary cancer	no	12
461	Unspecified	n/a	Prenatal	unknown	Prenatal	Blake's pouch cyst, ventriculomegaly, cavum veli interpositi	1	Mendeliome	no	11
462	Female	0.328767	Infant (1-23 months)	n/a	Postneonatal	Unknown	3	Metabolic disorders; Intellectual Disability; Mendeliome	no	1
463	Unspecified	n/a	Prenatal	unknown	Prenatal	Thickened nuchal skin fold, Blake's pouch cyst	2	Mendeliome; Rasopathies	conclusive	18
464	Female	0.0620302	Newborn	n/a	Neonatal	Heterotaxy, congenital heart defect	2	Ciliopathies; Mendeliome	no	9.35897
465	Male	0.0260889	Newborn	n/a	Neonatal	Facial dysmorphism, hypertelorism, low-set ears, large fontanelles, sandal gap, birth weight below the 3rd percentile, partial agenesis of the corpus callosum	1	Mendeliome	conclusive	12.4776
466	Female	0.287671	Infant (1-23 months)	n/a	Postneonatal	Unknown	1	Intellectual Disability	no	1
467	Unspecified	n/a	Prenatal	unknown	Prenatal	Shortened limbs	2	Skeletal dysplasia and short stature; Mendeliome	no	15
468	Unspecified	n/a	Prenatal	unknown	Prenatal	Bilateral cleft lip and palate	1	Cranio Facial Anomalies	conclusive	10
469	Female	0.619178	Infant (1-23 months)	n/a	Postneonatal	Epilepsy	1	Epilepsy	no	12
470	Female	19.6027	Adult (19-65 years)	n/a	Postneonatal	Primary congenital glaucoma, congenital mitral stenosis	3	Visual impairment; Cardiac disorder; Mendeliome	conclusive	12
471	Unspecified	n/a	Prenatal	unknown	Prenatal	Hydrocephalus, ventriculomegaly, ventricular septal defect	1	Intellectual Disability	no	12
472	Male	0.120548	Infant (1-23 months)	n/a	Postneonatal	Cerebral hemorrhage, hydrocephalus	1	Mendeliome	possible	14
473	Unspecified	n/a	Prenatal	22w0d	Prenatal	Ventriculomegaly, blunt frontal horns, absence of gallbladder	1	Mendeliome	no	12
474	Unspecified	n/a	Prenatal	unknown	Prenatal	Short nasal bone, polyhydramnios, small stomach, thickened nuchal fold	1	Mendeliome	no	13.541
475	Unspecified	n/a	Prenatal	unknown	Prenatal	Epispadias, bladder exstrophy, multicystic dysplastic kidney, micropenis, microcephaly	2	Renal disorders; Mendeliome	no	11
476	Female	0.0347464	Newborn	n/a	Neonatal	Premature birth, respiratory insufficiency, hypotonia	5	HMSN; Metabolic disorders; Intellectual Disability; Oxphos; Muscle disorder	conclusive	8.31757
477	Unspecified	n/a	Prenatal	31w2d	Prenatal	Skeletal dysplasia	2	Skeletal dysplasia and short stature; Intellectual Disability	conclusive	9.4344
478	Unspecified	n/a	Prenatal	unknown	Prenatal	hydrops fetalis, left Isomerism, cardiomyopathy, atrioventricular block	1	Mendeliome	no	58
479	Unspecified	n/a	Prenatal	20w4d	Prenatal	Hand and foot deformities, mild fetal ventriculomegaly, absence of nasal bone	1	Fetal Akenesie	conclusive	10
480	Female	0.0356164	Newborn	n/a	Neonatal	Amniotic constriction ring	1	Mendeliome	no	13
481	Unspecified	n/a	Prenatal	unknown	Prenatal	Hypoplastic right heart	2	Mendeliome; Intellectual Disability	no	11
482	Unspecified	n/a	Prenatal	21w2d	Prenatal	Median cleft lip and palate	2	Cranio Facial Anomalies; Mendeliome	no	9
483	Female	0.0356164	Newborn	n/a	Neonatal	Thrombocytopenia	1	Hemos	no	7
484	Unspecified	n/a	Prenatal	unknown	Prenatal	Cavum septum pellucidum	1	Intellectual Disability	conclusive	10
485	Unspecified	n/a	Prenatal	21w2d	Prenatal	Long bones shorter than 3rd percentile, head circumference at 90th-97th percentile	1	Skeletal dysplasia and short stature	no	8
486	Unspecified	n/a	Prenatal	22w2d	Prenatal	Congenital diaphragmatic hernia	1	Mendeliome	no	8
487	Unspecified	n/a	Prenatal	unknown	Prenatal	Skeletal dysplasia	1	Skeletal dysplasia and short stature	conclusive	7
488	Male	0.020901	Newborn	n/a	Neonatal	Ventriculomegaly, small cerebellum, clubfoot, thickened nuchal fold, facial dysmorphism, hypotonia	1	Mendeliome	no	6.37115
489	Female	18.6685	Adult (19-65 years)	n/a	Postneonatal	Pulmonary hypertension, dilated right ventricle, patellar dislocation, epistaxis	1	Mendeliome	no	11
490	Unspecified	n/a	Prenatal	unknown	Prenatal	Unilateral aplasia of the finger, macrocephaly	2	Skeletal dysplasia and short stature; Mendeliome	no	11
491	Male	0.00547945	Newborn	n/a	Neonatal	Polycystic kidney dysplasia	2	Ciliopathies; Renal disorders	no	11
492	Unspecified	n/a	Prenatal	unknown	Prenatal	Height less than 3rd percentile, clubfeet	1	Mendeliome	no	7
493	Unspecified	n/a	Prenatal	unknown	Prenatal	Unknown	2	Cardiac disorder; Mendeliome	conclusive	12
494	Male	0.40274	Infant (1-23 months)	n/a	Postneonatal	Small for gestional age, hypospadias, hypothyroidism, panctyopenia	2	Renal disorders; Oxphos	no	8
495	Male	0.754748	Infant (1-23 months)	n/a	Postneonatal	Immunodeficiency	1	Immune disorders	no	6.51691
496	Unspecified	n/a	Prenatal	unknown	Prenatal	Short nose, sacral segmentation defect	1	Mendeliome	no	8
497	Unspecified	n/a	Prenatal	18w4d	Prenatal	Hemimegalencephaly	4	Ciliopathies; Epilepsy; Intellectual Disability; Mendeliome	no	10.3488
498	Male	0.386301	Infant (1-23 months)	n/a	Postneonatal	Epileptic spasm, apnea	1	Epilepsy	conclusive	12
499	Female	0.260274	Infant (1-23 months)	n/a	Postneonatal	Encephalopathy, neurodevelopmental delay, visual impairment, axial hypotonia, large fontanelles	1	Intellectual Disability	conclusive	29
500	Female	0.0383562	Newborn	n/a	Neonatal	Neonatal seizures, focal EEG abnormality, macrosomia	1	Epilepsy	conclusive	12
501	Unspecified	n/a	Prenatal	unknown	Prenatal	Microcephaly, hydrocephalus, abnormal cortical gyration, lobar holoprosencephaly, abnormality of the corpus callosum	1	Mendeliome	possible	12
502	Female	22.2384	Adult (19-65 years)	n/a	Postneonatal	Myelodysplasia, immunodeficiency	2	Bone marrow failure	conclusive	29
503	Unspecified	n/a	Prenatal	unknown	Prenatal	Congenital heart defect, hypoplastic right heart, pulmonic stenosis	1	Mendeliome	no	7
504	Unspecified	n/a	Prenatal	unknown	Prenatal	Thickened nuchal skin fold	1	Mendeliome	no	10
505	Male	3.32877	Child, preschool (2-5 years)	n/a	Postneonatal	Unknown	3	Movement disorder; Metabolic disorders; Oxphos	no	13
506	Male	0.0136986	Newborn	n/a	Neonatal	Cardiomyopathy, fetal SVT	1	Cardiac disorder	no	21
507	Female	0.0191781	Newborn	n/a	Neonatal	Epilepsy	2	Epilepsy; Metabolic disorders	conclusive	9
508	Unspecified	n/a	Prenatal	unknown	Prenatal	Ambiguous genitalia, hypospadias	1	Disorder of Sex differentiation	no	7
509	Unspecified	n/a	Prenatal	21w1d	Prenatal	Abnormal septum pellucidum morphology	2	Epilepsy; Intellectual Disability	no	8
510	Male	1.03288	Infant (1-23 months)	n/a	Postneonatal	Small for gestational age, facial dysmorphism	1	Rasopathies	conclusive	51
511	Male	0.964384	Infant (1-23 months)	n/a	Postneonatal	Syndrome West, neurodevelopmental delay	2	Epilepsy; Intellectual Disability	no	14
512	Male	56.9068	Adult (19-65 years)	n/a	Postneonatal	Congenital hyptrophic cardiomyopathy	1	Rasopathies	no	46
513	Unspecified	n/a	Prenatal	21w4d	Prenatal	Bilateral cleft lip and palate, hypoplasia of cerebellum, vetriculomegaly	1	Mendeliome	conclusive	10
514	Unspecified	n/a	Prenatal	unknown	Prenatal	Split hand split foot	1	Mendeliome	no	8
515	Female	0.232877	Infant (1-23 months)	n/a	Postneonatal	Hyoptonia, small for gestational age, neurodevelopmental delay, facial dysmorphism	3	Metabolic disorders; Intellectual Disability; Oxphos	no	15
516	Female	4.83288	Child, preschool (2-5 years)	n/a	Postneonatal	Neurodevelopmental delay, small for gestional age, facial dysmorphism	1	Intellectual Disability	no	14
517	Unspecified	n/a	Prenatal	unknown	Prenatal	Thickened nuchal skin fold	1	Rasopathies	no	28
518	Male	28.1644	Adult (19-65 years)	n/a	Postneonatal	Inguinal hernia, high myopia, ventricular septal defect, neurodevelopmental delay	1	Rasopathies	no	41
519	Female	2.44932	Child, preschool (2-5 years)	n/a	Postneonatal	Suspect for trisomy 21	1	Mendeliome	no	11
520	Female	18.2603	Adolescence (13-18 years)	n/a	Postneonatal	Respiratory distress, sore throat, Rhinorrhea, ear pain	1	Immune disorders	no	14
521	Unspecified	n/a	Prenatal	unknown	Prenatal	Intrauterine growth retardation	3	Skeletal dysplasia and short stature; Intellectual Disability; Mendeliome	no	11
522	Unspecified	n/a	Prenatal	unknown	Prenatal	Tetralogy of Fallot	3	Cardiac disorder; Intellectual Disability; Mendeliome	no	7
523	Female	0.120548	Infant (1-23 months)	n/a	Postneonatal	Epilepsy	1	Epilepsy	conclusive	10
524	Male	0.0794521	Infant (1-23 months)	n/a	Postneonatal	Facial dysmorphism, long toe en finger, muscle weakness	1	Muscle disorder	conclusive	19
525	Male	0.00821918	Newborn	n/a	Neonatal	Short long bones, facial dysmorphism, micropenis, small for gestational age	1	Skeletal dysplasia and short stature	conclusive	10
526	Unspecified	n/a	Prenatal	unknown	Prenatal	Suspect for noonan syndrome	1	Rasopathies	no	28
527	Male	0.278472	Infant (1-23 months)	n/a	Postneonatal	Congenital myopathy	1	Muscle disorder	no	22.3577
528	Male	1.18819	Infant (1-23 months)	n/a	Postneonatal	Hyoptonia, epipelsy, devolopmental delay, hemiparesis	2	Epilepsy; Intellectual Disability	no	19.311
529	Unspecified	n/a	Prenatal	unknown	Prenatal	Short long bone, abnormality of femur morphology	1	Skeletal dysplasia and short stature	conclusive	16
530	Unspecified	n/a	Prenatal	unknown	Prenatal	Hyopspadia, agenesis of corpus callosum	2	Intellectual Disability; Mendeliome	conclusive	9
531	Unspecified	n/a	Prenatal	unknown	Prenatal	Congenital heart defect	1	Mendeliome	no	9
532	Unspecified	n/a	Prenatal	unknown	Prenatal	Congenital heart defect	1	Mendeliome	conclusive	9
533	Female	0.0191781	Newborn	n/a	Neonatal	Hydrothorax	1	Rasopathies	no	24
534	Female	11.6835	Child (6-12 years)	n/a	Postneonatal	Cleft palate, rhabdomyoma, pierre-Robin sequence, wolff-Parkinson-White syndrome	2	Mendeliome; Hereditary cancer	conclusive	20.5279
535	Unspecified	n/a	Prenatal	21w2d	Prenatal	Preaxial polydactyly	2	Skeletal dysplasia and short stature; Mendeliome	no	8
536	Female	20.6493	Adult (19-65 years)	n/a	Postneonatal	Small for gestational age, atrial septal defect, facial dysmorphism, esophageal atresia	1	Mendeliome	no	20
537	Unspecified	n/a	Prenatal	32w2d	Prenatal	Suspect for Joubert syndrome	2	Ciliopathies; Epilepsy	conclusive	8
538	Unspecified	n/a	Prenatal	20w3d	Prenatal	Overriding aorta, bilateral foot deformities, bilateral wrist flexion contracture, suprarenal kidney cyst	1	Mendeliome	no	11
539	Unspecified	n/a	Prenatal	20w3d	Prenatal	Macrocephaly, ventriculomegaly, absent septum pellucidum	2	Intellectual Disability; Mendeliome	no	20
540	Unspecified	n/a	Prenatal	12w2d	Prenatal	Fetal cystic hygroma, aorta hypoplasia, polyhydramnios, facial dysmorphism	1	Mendeliome	conclusive	11
541	Unspecified	n/a	Prenatal	unknown	Prenatal	Thickened nuchal skin fold, hypospadias, persistent left superior vena cava, absent galbladder	1	Mendeliome	possible	24
542	Unspecified	n/a	Prenatal	20w6d	Prenatal	Congenital diaphragmatic hernia	1	Mendeliome	no	9
543	Unspecified	n/a	Prenatal	20w5d	Prenatal	Congenital diaphragmatic hernia	2	Intellectual Disability; Mendeliome	no	10.6317
544	Male	25.8658	Adult (19-65 years)	n/a	Postneonatal	Epilepsy, Intellectual disability	1	Epilepsy	no	11
545	Unspecified	n/a	Prenatal	21w0d	Prenatal	Facial dysmorphism	2	Cranio Facial Anomalies; Mendeliome	no	11
546	Unspecified	n/a	Prenatal	20w1d	Prenatal	Schizencephaly, ventriculomegaly, renal hypoplasia	2	Intellectual Disability; Mendeliome	conclusive	8
547	Unspecified	n/a	Prenatal	18w0d	Prenatal	Short long bone, atrioventricular block, pulmonary stenosis	2	Mendeliome; Cardiac disorder	no	13
548	Female	27.9699	Adult (19-65 years)	n/a	Postneonatal	Epilepsy, Intellectual disability	2	Epilepsy; Intellectual Disability	no	8.25
549	Unspecified	n/a	Prenatal	20w0d	Prenatal	Phocomelia, short chin, abnormality of the nasal skeleton	1	Skeletal dysplasia and short stature	conclusive	9
550	Unspecified	n/a	Prenatal	unknown	Prenatal	Abnormality of limbs	2	Skeletal dysplasia and short stature; Mendeliome	no	10
551	Unspecified	n/a	Prenatal	20w4d	Prenatal	Intrauterine growth retardation, ambiguous genitalia, single umbilical artery, persistent right umbilical vein	2	Disorder of Sex differentiation; Mendeliome	no	6.41666
552	Unspecified	n/a	Prenatal	21w0d	Prenatal	Pulmonic stenosis	3	Cardiac disorder; Mendeliome; Rasopathies	no	11.6317
553	Unspecified	n/a	Prenatal	20w5d	Prenatal	Unknown	2	Fetal Akenesie; Muscle disorder	no	29
554	Unspecified	n/a	Prenatal	23w5d	Prenatal	Thickened nuchal skin fold	3	Skeletal dysplasia and short stature; Metabolic disorders; Mendeliome	no	10
555	Female	65.4603	Adult (19-65 years)	n/a	Postneonatal	Porphyria, ovarian neoplasm, hepatic cysts	1	Mendeliome	conclusive	13
556	Female	3.59178	Child, preschool (2-5 years)	n/a	Postneonatal	Atypical Teratoid Rhabdoid Tumor	1	Hereditary cancer	no	22
557	Female	24.0151	Adult (19-65 years)	n/a	Postneonatal	Facial dysmorphism, nystagmus, polydactyly, hepatomegaly, hypotonia, global developmental delay	3	Ciliopathies; Intellectual Disability; Mendeliome	conclusive	9.50395
558	Male	40.9178	Adult (19-65 years)	n/a	Postneonatal	Cardiomyopathy, chronic kidney disease, retinitis pigmentosa, vitiligo, hashimoto thyroiditis, immunodeficiency	2	Renal disorders	no	24
559	Unspecified	n/a	Prenatal	19w4d	Prenatal	Ventriculomegaly, blake's pouch cyst	2	Intellectual Disability; Mendeliome	no	13
560	Unspecified	n/a	Prenatal	22w5d	Prenatal	Cerebellar hypoplasia, cardiomegaly	1	Mendeliome	no	10
561	Female	55.8027	Adult (19-65 years)	n/a	Postneonatal	Increased circulating antibody level, nephrotic syndrome	2	Renal disorders	no	17
562	Male	40.8877	Adult (19-65 years)	n/a	Postneonatal	Severe Intellectual disability, epilepsy	1	Intellectual Disability	possible	13
563	Unspecified	n/a	Prenatal	28w0d	Prenatal	Polyhydramions, multiple congenital anomalies	1	Mendeliome	conclusive	12
564	Male	11.6356	Child (6-12 years)	n/a	Postneonatal	Abnormality of von Willebrand factor	1	Hemos	no	16
565	Male	16.1781	Adolescence (13-18 years)	n/a	Postneonatal	Functional motor deficit, myoclonus, Intellectual disability	2	Movement disorder; Intellectual Disability	no	10
566	Unspecified	n/a	Prenatal	26w0d	Prenatal	Stillbirth, hydrops fetalis, single umbilical artery	1	Mendeliome	no	17
567	Male	13.2521	Adolescence (13-18 years)	n/a	Postneonatal	Epilepsy, conductive hearing impairment, delayed speech and language development	1	Epilepsy	conclusive	12
568	Unspecified	n/a	Prenatal	26w3d	Prenatal	Fetal akinesia	3	Fetal Akenesie; HMSN; Muscle disorder	no	11
569	Unspecified	n/a	Prenatal	32w3d	Prenatal	Microcephaly, severe intrauterine growth retardation, dolichocephaly, hemivertebrae, retrognathy	1	Mendeliome	no	14
570	Male	26.9123	Adult (19-65 years)	n/a	Postneonatal	Immunodeficiency, Non-Hodgkin lymphoma	1	Immune disorders	no	30
571	Male	7.0274	Child (6-12 years)	n/a	Postneonatal	Epilepsy	1	Epilepsy	no	15
572	Unspecified	n/a	Prenatal	20w6d	Prenatal	Short limbs, sacral agenesis	1	Skeletal dysplasia and short stature	conclusive	11
573	Male	33.7753	Adult (19-65 years)	n/a	Postneonatal	Suspect for stargardt Disease	1	Visual impairment	possible	25
574	Male	36.7288	Adult (19-65 years)	n/a	Postneonatal	Abnormal optic nerve morphology	1	Visual impairment	no	14
575	Unspecified	n/a	Prenatal	22w1d	Prenatal	Short bones, small for gestational age, skeletal dysplasia, narrow thorax	1	Skeletal dysplasia and short stature	no	13
										*TAT unknown
